# Supplementary material for: Novel etodolac derivatives as eukaryotic elongation factor 2 kinase (eEF2K) inhibitors for targeted cancer therapy
Source: Royal Society of Chemistry journal article supplement (doi:10.1039/d2md00105e), 2022-01-01
Supplement: d2md00105e1.pdf [file d2md00105e1.pdf]

Supporting Information

**Novel Etodolac Derivatives as Eukaryotic Elongation Factor 2 Kinase (eEF2K) Inhibitors  
for Targeted Cancer Therapy**

Ferah Comert Onder<sup>a-c\*</sup>, Pinar Siyah<sup>d</sup>, Serdar Durdagi<sup>d\*</sup>, Mehmet Ay<sup>c</sup>, Bulent Ozpolat<sup>b,e\*</sup>

<sup>a</sup>Department of Medical Biology, Çanakkale Onsekiz Mart University, Faculty of Medicine, 17020 Çanakkale, Turkey

<sup>b</sup>Department of Experimental Therapeutics, The University of Texas, MD Anderson Cancer Center, 1515 Holcombe Boulevard, Unit 422, Houston, TX 77030, USA

<sup>c</sup>Department of Chemistry, Natural Products and Drug Research Laboratory, Çanakkale Onsekiz Mart University, Faculty of Science and Arts, 17020 Çanakkale, Turkey

<sup>d</sup>Computational Biology and Molecular Simulations Laboratory, Department of Biophysics, School of Medicine, Bahcesehir University, 34734 Istanbul, Turkey

<sup>e</sup>Center for RNA Interference and Non-Coding RNAs, The University of Texas, MD Anderson Cancer Center, Houston, TX, USA

Short title: **Etodolac Derivatives as Eukaryotic Elongation Factor 2 Kinase (eEF2K) Inhibitors**

**Corresponding authors:**

Ferah Comert Onder, Department of Medical Biology, Çanakkale Onsekiz Mart University, Faculty of Medicine, 17020 Canakkale, Turkey. Email: [ferahcomertonder@comu.edu.tr](mailto:ferahcomertonder@comu.edu.tr) (FCO)

Serdar Durdagi, Computational Biology and Molecular Simulations Laboratory, Department of Biophysics, School of Medicine, Bahcesehir University, 34734 Istanbul, Turkey

Email: [serdar.durdagi@med.bau.edu.tr](mailto:serdar.durdagi@med.bau.edu.tr) (SD)

Bulent Ozpolat, Department of Experimental Therapeutics, The University of Texas, MD Anderson Cancer Center, 1515 Holcombe Boulevard, Unit 422, Houston, TX 77030, USA

Email: [bozpolat@mdanderson.org](mailto:bozpolat@mdanderson.org) (BO)

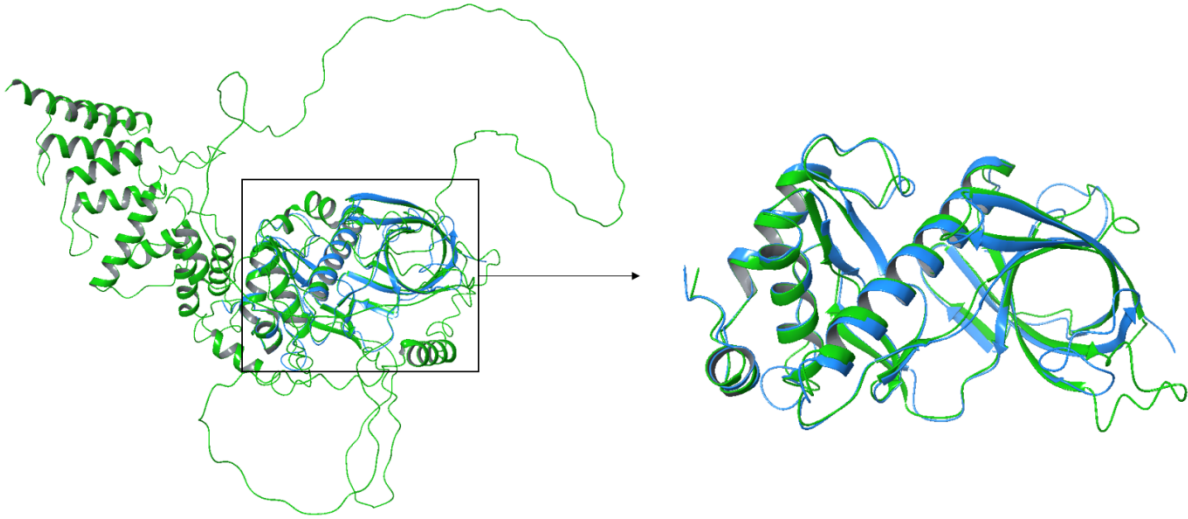

**Figure S1.** Alignment of 3D structures of alphafold (green) and homology model (blue) structure used in this study (RMSD: 1.5 Å).

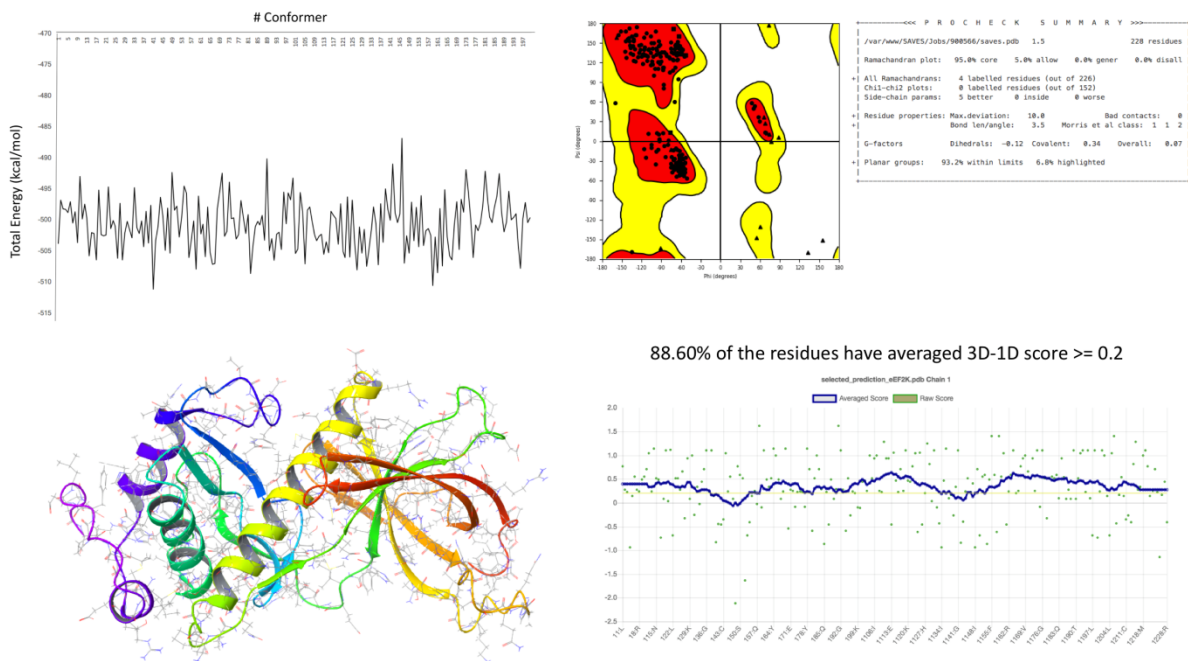

**Figure S2.** Developed model by combined Alphafold and Rosetta approaches. The model that has the lowest total energy (model no #41) was used. Ramachandran's plot showed that all the residues at the allowed region. Verify3D and PROCHECK protein validation tools validated the used model.

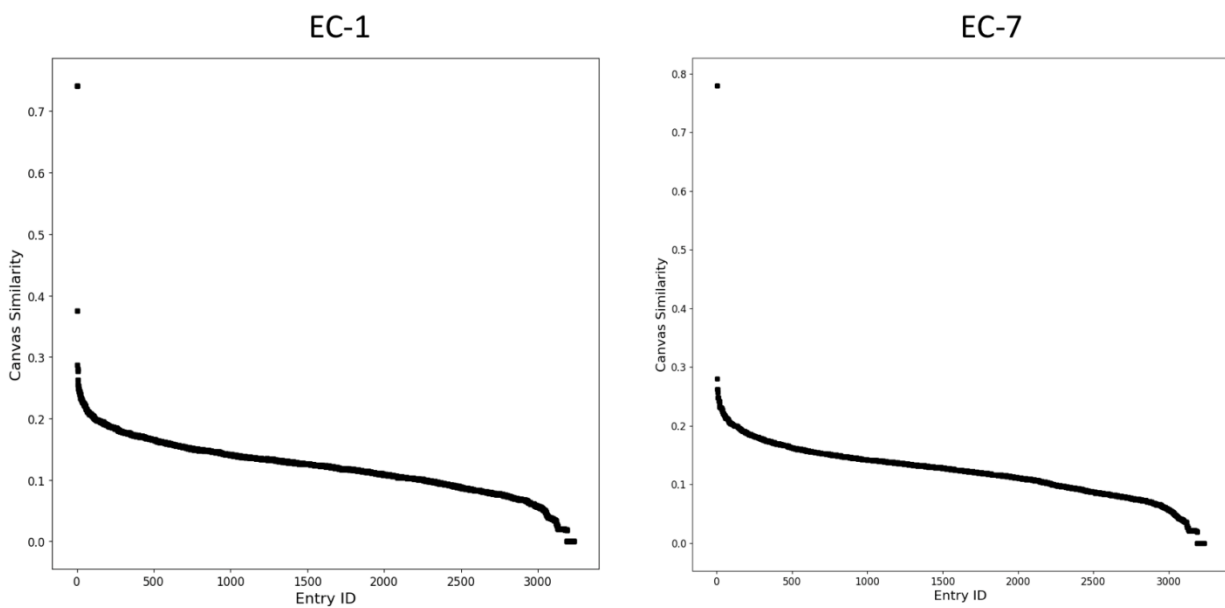

**Figure S3.** Structural similarity comparison of EC1 (left) and EC7 (right) with FDA approved compounds.

**Table S1.** Toxicity prediction analysis of the synthesized compounds.

| Name                                                  | EC1  | EC2  | EC3  | EC4  | EC5  | EC6  | EC7  |
|-------------------------------------------------------|------|------|------|------|------|------|------|
| AMES (TP) <sup>(1)</sup>                              | 0.6  | 0.46 | 0.57 | 0.51 | 0.4  | 0.5  | 0.38 |
| Anemia (TP) <sup>(2)</sup>                            | 0.31 | 0.19 | 0.22 | 0.3  | 0.22 | 0.34 | 0.21 |
| Carcinogenicity (TP) <sup>(3)</sup>                   | 0.06 | 0.08 | 0.06 | 0.04 | 0.07 | 0.04 | 0.05 |
| Carcinogenicity Mouse Female (TP) <sup>(4)</sup>      | 0.12 | 0.18 | 0.12 | 0.04 | 0.1  | 0.04 | 0.12 |
| Carcinogenicity Mouse Male (TP) <sup>(5)</sup>        | 0.1  | 0.12 | 0.1  | 0.05 | 0.11 | 0.05 | 0.14 |
| Carcinogenicity Rat Female (TP) <sup>(6)</sup>        | 0.06 | 0.13 | 0.06 | 0.07 | 0.16 | 0.07 | 0.19 |
| Carcinogenicity Rat Male (TP) <sup>(7)</sup>          | 0.07 | 0.19 | 0.07 | 0.05 | 0.16 | 0.05 | 0.16 |
| Cardiotoxicity (TP) <sup>(8)</sup>                    | 0.33 | 0.18 | 0.33 | 0.31 | 0.16 | 0.31 | 0.3  |
| Cytotoxicity model, -log GI50 (M) (TP) <sup>(9)</sup> | 5.9  | 5.98 | 5.9  | 5.64 | 5.61 | 5.6  | 5.44 |
| Epididymis toxicity (TP) <sup>(10)</sup>              | 0.23 | 0.23 | 0.23 | 0.15 | 0.15 | 0.15 | 0.19 |
| Genotoxicity (TP) <sup>(11)</sup>                     | 0.31 | 0.28 | 0.31 | 0.4  | 0.48 | 0.46 | 0.38 |
| Hepatotoxicity (TP) <sup>(12)</sup>                   | 0.14 | 0.19 | 0.13 | 0.16 | 0.19 | 0.15 | 0.15 |
| Kidney Necrosis (TP) <sup>(13)</sup>                  | 0.04 | 0.11 | 0.04 | 0.04 | 0.1  | 0.04 | 0.07 |
| Kidney Weight Gain (TP) <sup>(14)</sup>               | 0.04 | 0.04 | 0.04 | 0.04 | 0.06 | 0.04 | 0.06 |

|                                               |       |       |      |       |       |       |       |
|-----------------------------------------------|-------|-------|------|-------|-------|-------|-------|
| Liver Cholestasis (TP) <sup>(15)</sup>        | 0.15  | 0.2   | 0.15 | 0.5   | 0.52  | 0.5   | 0.43  |
| Liver Lipid Accumulation (TP) <sup>(16)</sup> | 0.15  | 0.16  | 0.15 | 0.13  | 0.13  | 0.13  | 0.13  |
| Liver Necrosis (TP) <sup>(17)</sup>           | 0.18  | 0.16  | 0.18 | 0.15  | 0.16  | 0.15  | 0.16  |
| Liver Weight Gain (TP) <sup>(18)</sup>        | 0.18  | 0.18  | 0.16 | 0.2   | 0.22  | 0.2   | 0.18  |
| MRTD (TP) <sup>(19)</sup>                     | 0.06  | 0.16  | 0.06 | 0.0   | 0.08  | 0.08  | 0.05  |
| Nasal pathology (TP) <sup>(20)</sup>          | 0.19  | 0.23  | 0.19 | 0.18  | 0.31  | 0.18  | 0.35  |
| Nephron Injury (TP) <sup>(21)</sup>           | 0.17  | 0.1   | 0.17 | 0.21  | 0.21  | 0.21  | 0.23  |
| Nephrotoxicity (TP) <sup>(22)</sup>           | 0.07  | 0.08  | 0.07 | 0.1   | 0.08  | 0.1   | 0.06  |
| Neurotoxicity (TP) <sup>(23)</sup>            | 0.23  | 0.38  | 0.27 | 0.3   | 0.39  | 0.3   | 0.35  |
| Pulmonary toxicity (TP) <sup>(24)</sup>       | 0.07  | 0.08  | 0.07 | 0.07  | 0.08  | 0.07  | 0.14  |
| SkinSens, EC3 (TP) <sup>(25)</sup>            | 62.11 | 66.84 | 52.7 | 45.62 | 44.24 | 45.98 | 44.71 |
| Testicular toxicity (TP) <sup>(26)</sup>      | 0.11  | 0.09  | 0.11 | 0.13  | 0.13  | 0.13  | 0.17  |

1. Potential to be mutagenic (AMES positive), range from 0 to 1. A value of 1 is AMES positive (mutagenic), and a value of 0 is AMES negative (non-mutagenic). Cutoff is 0.5. Values close to zero are preferable. The AMES assay is based upon the reversion of mutations in the histidine operon in the bacterium *Salmonella enterica* sv Typhimurium.

2. Potential for causing anemia. Cutoff is 0.5. Values higher than 0.5 indicate potentially toxic compounds. Training set consists of chemicals and drugs causing anemia in vivo. Model organisms: human. Model description: Training set N=324, Test set N=51, Sensitivity= 0.82, Specificity=0.90, Accuracy=0.86, MCC=0.72.

3. Potential for inducing carcinogenicity in rats and mice. Cutoff is 0.5. Values higher than 0.5 indicate potentially toxic compounds. Training set consists of chemicals and drugs causing carcinogenicity in vivo. Model organisms: mouse, rat. Model description: Training set N=1210, Test set N=185, Sensitivity= 0.96, Specificity=0.90, Accuracy=0.93, MCC=0.86.

4. Potential for inducing carcinogenicity in female mice. Cutoff is 0.5. Values higher than 0.5 indicate potentially toxic compounds. Training set consists of chemicals and drugs causing carcinogenicity in vivo. Model organisms: female mice. Model description: Training set N=640, Test set N=94, Sensitivity= 0.90, Specificity=0.93, Accuracy=0.92, MCC=0.83.

5. Potential for inducing carcinogenicity in male mice. Cutoff is 0.5. Values higher than 0.5 indicate potentially toxic compounds. Training set consists of chemicals and drugs causing carcinogenicity in vivo. Model organisms: mouse male. Model description: Training set N=584, Test set N=93, Sensitivity= 0.91, Specificity=0.88, Accuracy=0.89, MCC=0.78.

6. Potential for inducing carcinogenicity in female rats. Cutoff is 0.5. Values higher than 0.5 indicate potentially toxic compounds. Training set consists of chemicals and drugs causing carcinogenicity in vivo. Model organisms: female rat. Model description: Training set N=667, Test set N=120, Sensitivity= 0.90, Specificity=0.96, Accuracy=0.93, MCC=0.86.

7. Potential for inducing carcinogenicity in male rats. Cutoff is 0.5. Values higher than 0.5 indicate potentially toxic compounds. Training set consists of chemicals and drugs causing carcinogenicity in vivo. Model organisms: male rat. Model description: Training set N=715, Test set N=117, Sensitivity= 0.92, Specificity=0.88, Accuracy=0.90, MCC=0.79.

8. Potential for inducing cardiotoxicity. Cutoff is 0.5. Values higher than 0.5 indicate potentially toxic compounds. Training set consists of chemicals and drugs causing cardiotoxicity in vivo. Model organisms: mouse, rat, human. Model description: Training set N=143, Test set N=30, Sensitivity= 0.80, Specificity=1.00, Accuracy=0.90, MCC=0.82.

9. Growth inhibition of MCF7 cell line (human caucasian breast adenocarcinoma), pGI50. Cutoff is 6. Values from 6 to 8 correspond to a toxic metabolite, values less than 6 are preferable, values less than 3 are more preferable and less toxic. Model description: N=1474, R2=0.9, RMSE=0.05.

10. Potential for inducing epididymis toxicity. Training set consists of chemicals and drugs causing epididymis toxicity in vivo. Model organisms: mouse, rat, human. Cutoff is 0.5. Values higher than 0.5 indicate potentially toxic compounds. Model description: Training set N=252, Test set N=42, Sensitivity= 0.90, Specificity=0.86, Accuracy=0.88, MCC=0.76.

11. Potential for inducing genotoxicity. Cutoff is 0.5. Values higher than 0.5 indicate potentially toxic compounds. Training set consists of chemicals and drugs causing genotoxicity in vivo. Model organisms: mouse, rat. Model description: Training set N=372, Test set N=86, Sensitivity= 0.75, Specificity=0.84, Accuracy=0.79, MCC=0.59.

12. Potential for inducing hepatotoxicity. Cutoff is 0.5. Values higher than 0.5 indicate potentially toxic compounds. Training set consists of chemicals and drugs causing hepatotoxicity in vivo. Model organisms: mouse, rat, human. Model description: Training set N=1380, Test set N=231, Sensitivity= 0.73, Specificity=0.88, Accuracy=0.81, MCC=0.62.

13. Potential for inducing kidney necrosis. Cutoff is 0.5. Values higher than 0.5 indicate potentially toxic compounds. Training set consists of chemicals and drugs causing renal necrosis in vivo. Model organisms: mouse, rat, human. Model description: Training set N=221, Test set N=42, Sensitivity= 0.96, Specificity=1.00, Accuracy=0.98, MCC=0.95.

14. Potential for inducing kidney weight gain. Cutoff is 0.5. The values higher than 0.5 indicate potentially toxic compounds. Training set consists of chemicals and drugs causing kidney weight gain in vivo. Model organisms: mouse, rat. Model description: Training set N=240, Test set N=49, Sensitivity= 0.95, Specificity=1.00, Accuracy=0.98, MCC=0.96.

15. Potential for inducing liver cholestasis. Cutoff is 0.5. Values higher than 0.5 indicate potentially toxic compounds. Training set consists of chemicals and drugs causing cholestasis in vivo. Model organisms: mouse, rat, human. Model description: Training set N=218, Test set N=35, Sensitivity= 0.79, Specificity=0.67, Accuracy=0.74, MCC=0.46.

16. Potential for inducing liver lipid accumulation. Cutoff is 0.5. Values higher than 0.5 indicate potentially toxic compounds. Training set consists of chemicals and drugs causing lipid accumulation in vivo. Model organisms: mouse, rat, human. Model description: Training set N=172, Test set N=28, Sensitivity= 0.80, Specificity=0.85, Accuracy=0.82, MCC=0.64.

17. Potential for inducing liver necrosis. Cutoff is 0.5. Values higher than 0.5 indicate potentially toxic compounds. Training set consists of chemicals and drugs causing hepatic necrosis in vivo. Model organisms: mouse, rat, human. Model description: Training set N=300, Test set N=57, Sensitivity= 0.91, Specificity=0.91, Accuracy=0.91, MCC=0.82.

18. Potential for inducing liver weight gain. Cutoff is 0.5. Values higher than 0.5 indicate potential liver weight-changing compounds. Training set consists of chemicals and drugs causing liver weight gain in vivo. Model organisms: mouse, rat. Model description: Training set N=292, Test set N=52, Sensitivity= 1.00, Specificity=1.00, Accuracy=1.00, MCC=1.00.

19. Maximum Recommended Therapeutic Dose, log mg/kg-bm/day, range is from -5 to 3. Cutoff is 0.5. Chemicals with high log MRTDs can be classified as mildly toxic compounds, chemicals with low log MRTDs as highly toxic compounds. Model description: N=1209, R2= 0.86, RMSE=0.42.

20. Potential for causing nasal pathology. Training set consists of chemicals and drugs causing nasal pathology in vivo. Model organisms: mouse, rat, human. Cutoff is 0.5. Values higher than 0.5 indicate potentially toxic compounds. Model description: Training set N=246, Test set N=47, Sensitivity= 1.00, Specificity=0.93, Accuracy=0.96, MCC=0.92.
21. Potential for inducing nephron injury. Cutoff is 0.5. Values higher than 0.5 indicate potentially toxic compounds. Training set consists of chemicals and drugs causing nephron injury in vivo. Model organisms: mouse, rat, human. Model description: Training set N=598, Test set N=109, Sensitivity= 0.91, Specificity=1.00, Accuracy=0.96, MCC=0.93.
22. Potential for inducing nephrotoxicity. Cutoff is 0.5. Values higher than 0.5 indicate potentially toxic compounds. Training set consists of chemicals and drugs causing nephrotoxicity in vivo. Model organisms: mouse, rat, human. Model description: Training set N=847, Test set N=154, Sensitivity= 0.90, Specificity=0.84, Accuracy=0.87, MCC=0.74.
23. Potential for inducing neurotoxicity. Training set consists of chemicals and drugs causing neurotoxicity in vivo. Model organisms: mouse, rat, human. Cutoff is 0.5. Values higher than 0.5 indicate potentially toxic compounds. Model description: Training set N=175, Test set N=34, Sensitivity= 0.94, Specificity=0.94, Accuracy=0.94, MCC=0.88.
24. Potential for inducing pulmonary toxicity. Training set consists of chemicals and drugs causing pulmonary toxicity in vivo. Model organisms: mouse, rat, human. Cutoff is 0.5. Values higher than 0.5 indicate potentially toxic compounds. Model description: Training set N=482, Test set N=87, Sensitivity= 0.89, Specificity=0.88, Accuracy=0.89, MCC=0.77.
25. Skin sensitization potential expressed as effective concentration 3, EC3 %. Values higher than 10 indicate weak and moderate sensitizers. Model description: N=89, R2=0.67, RMSE=22.56.
26. It consists of chemicals and drugs causing testicular toxicity in vivo. Model organisms: mouse, rat, human. Cutoff is 0.5. Values higher than 0.5 indicate potentially toxic compounds. Model description: Training set N=439, Test set N=88, Sensitivity= 0.81, Specificity=0.85, Accuracy=0.83, MCC=0.66. a. Potential activity against cancer. Cutoff is 0.5. Values higher than 0.5 indicate potentially active compounds. Training set consists of approved drugs. Model description: Training set N=886, Test set N=167, Sensitivity= 0.89, Specificity=0.83, Accuracy=0.86, MCC=0.72.

## Spectroscopic analysis

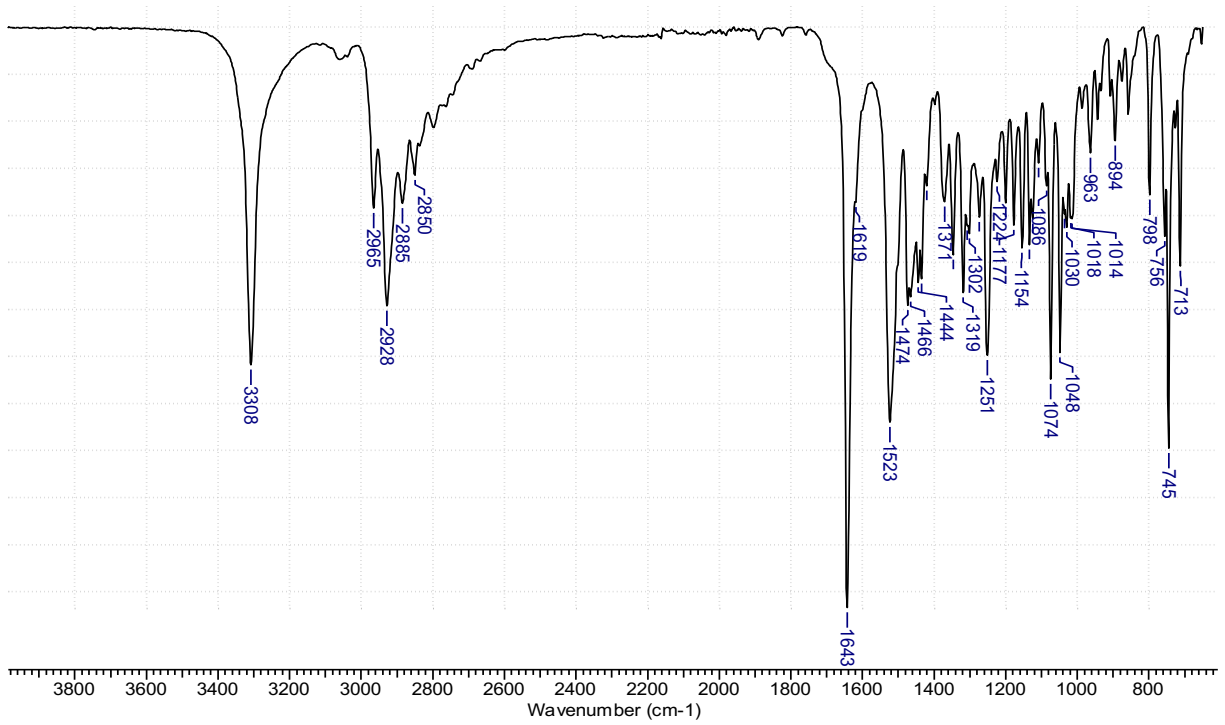

Figure S4. FT-IR spectra of compound EC1

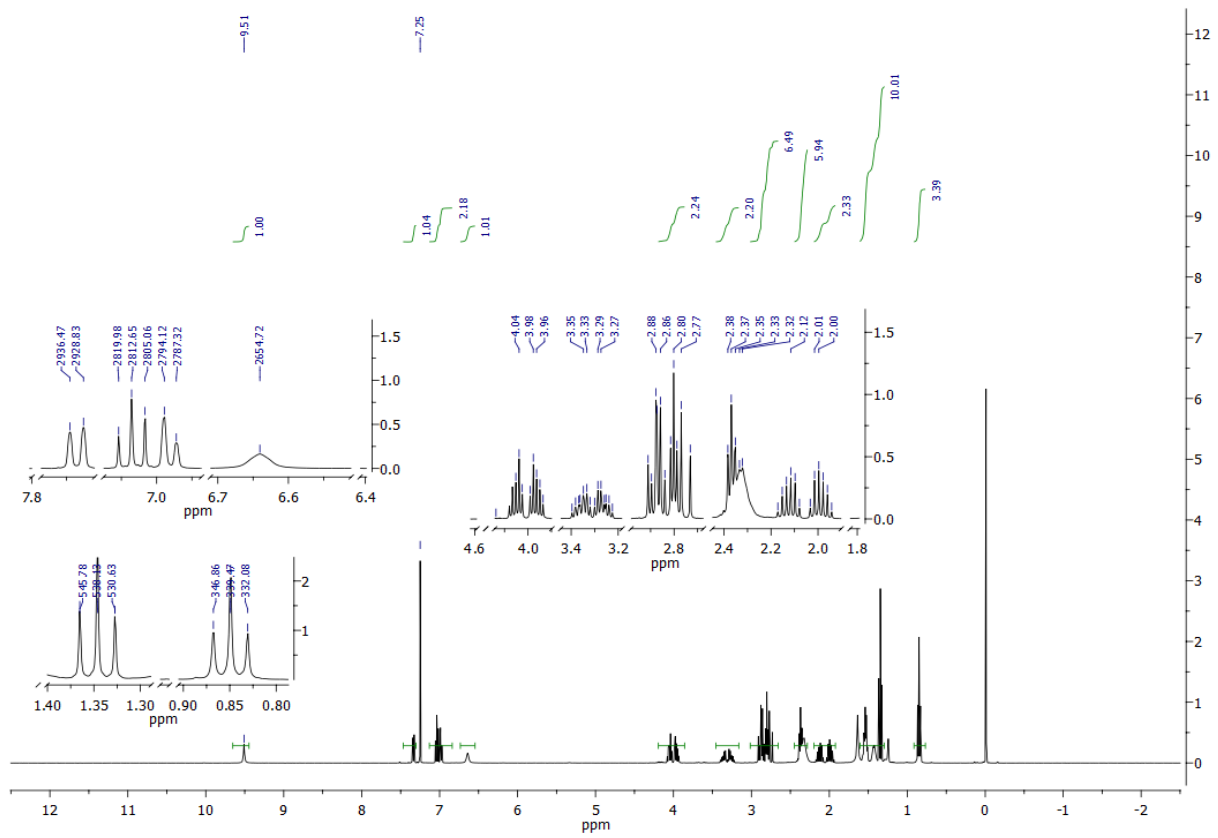

Figure S5. <sup>1</sup>H NMR spectra of compound EC1



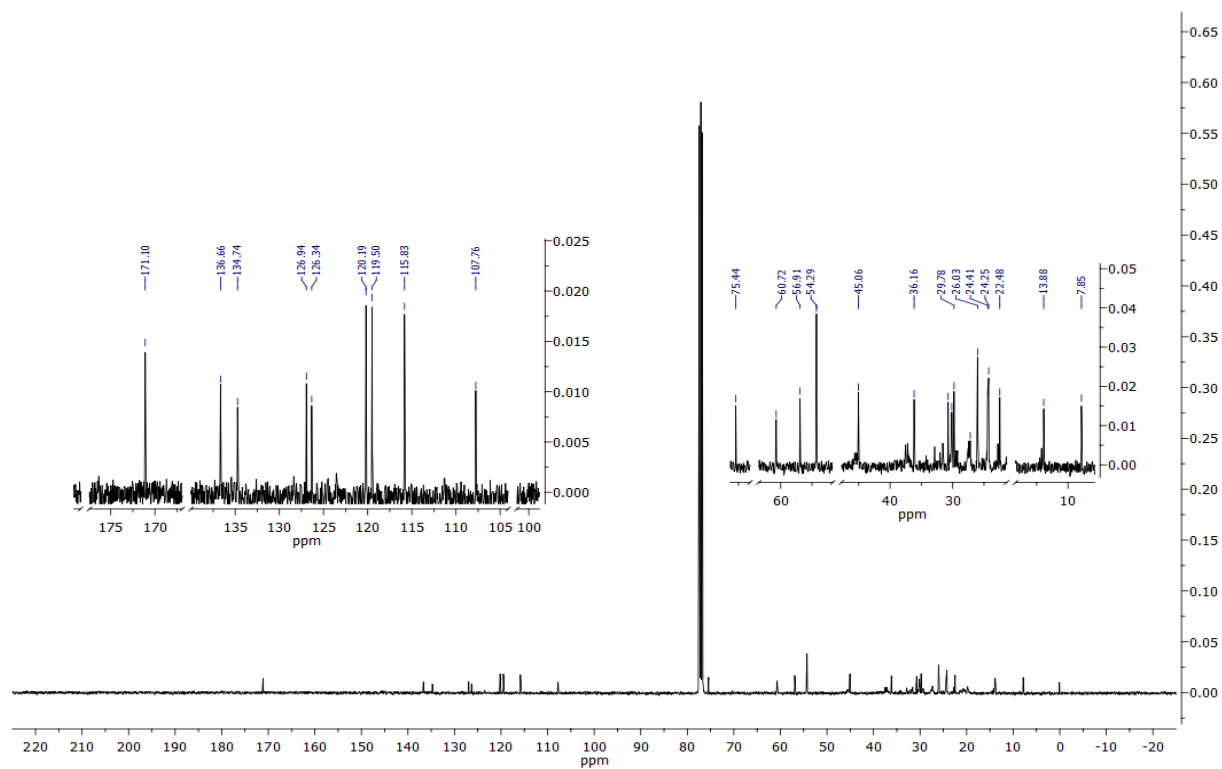

Figure S6.  $^{13}\text{C}$  NMR spectra of compound EC1

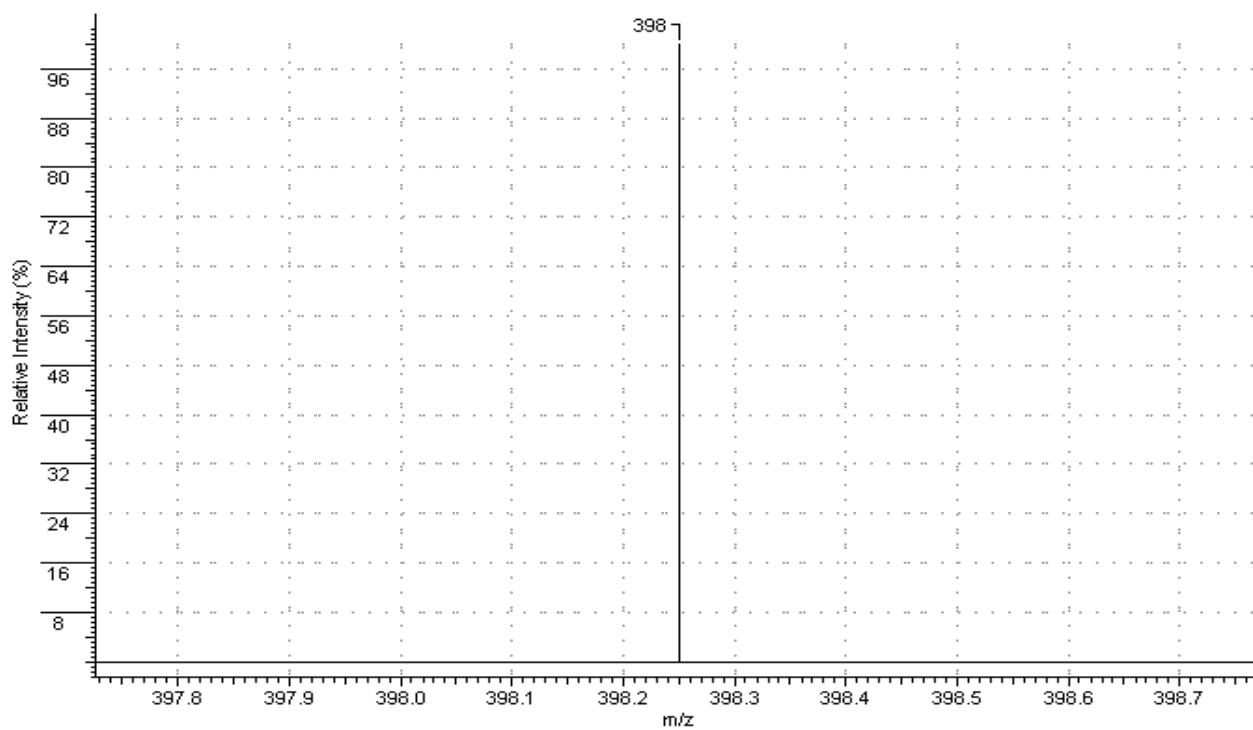

Figure S7. LC-MS/MS spectra of compound EC1

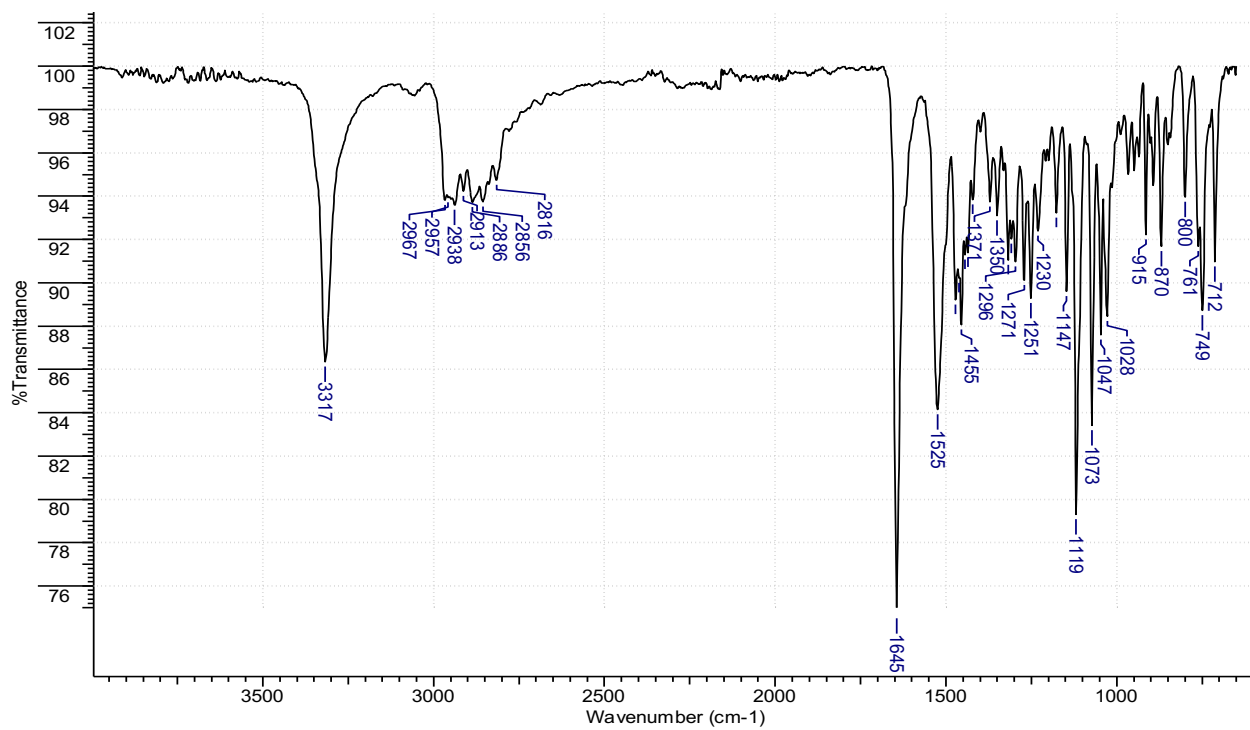

**Figure S8.** FT-IR spectra of compound EC2

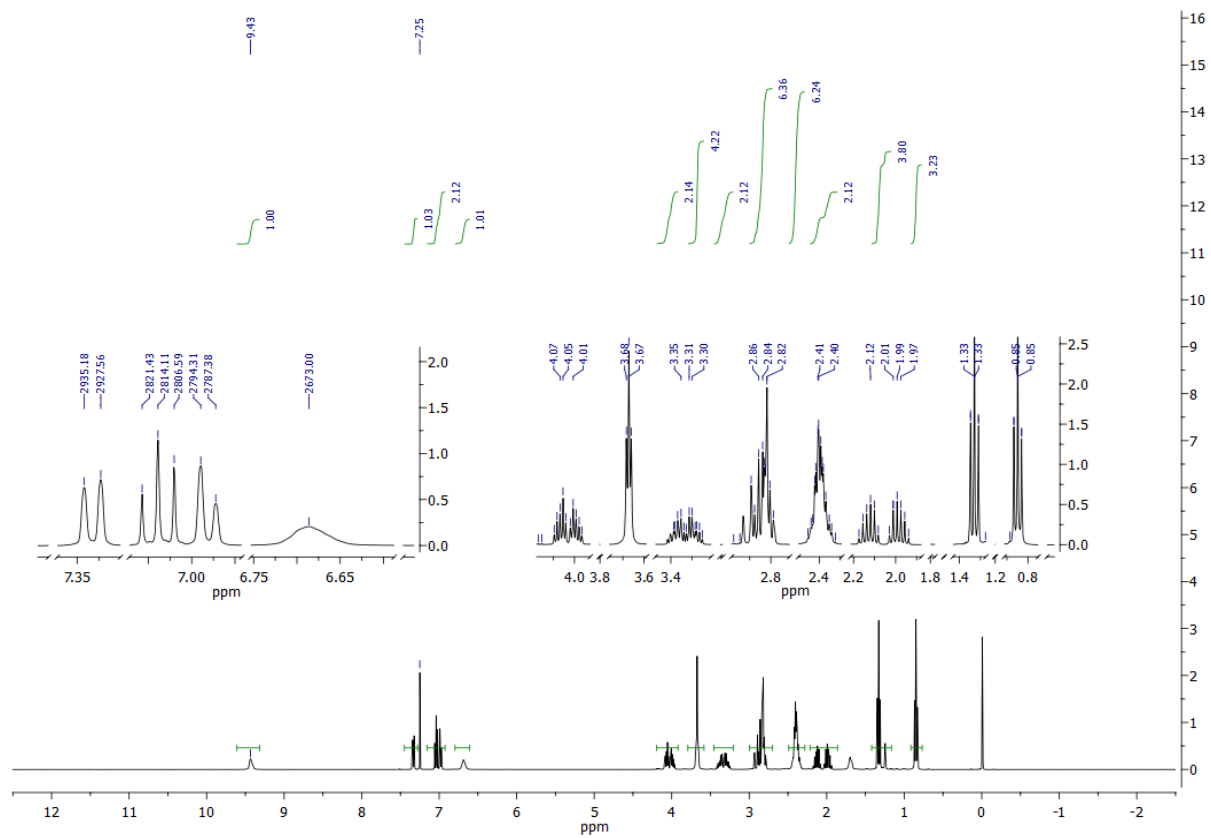

**Figure S9.** <sup>1</sup>H NMR spectra of compound EC2

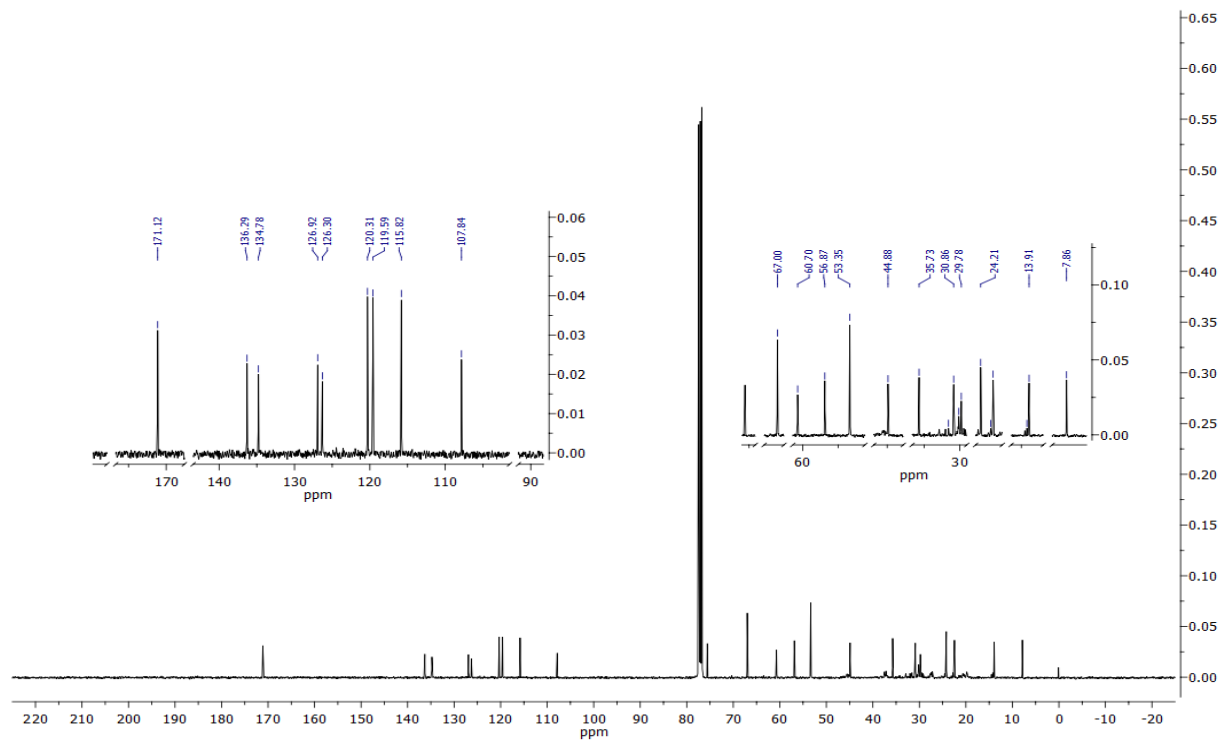

Figure S10. <sup>13</sup>C NMR spectra of compound EC2

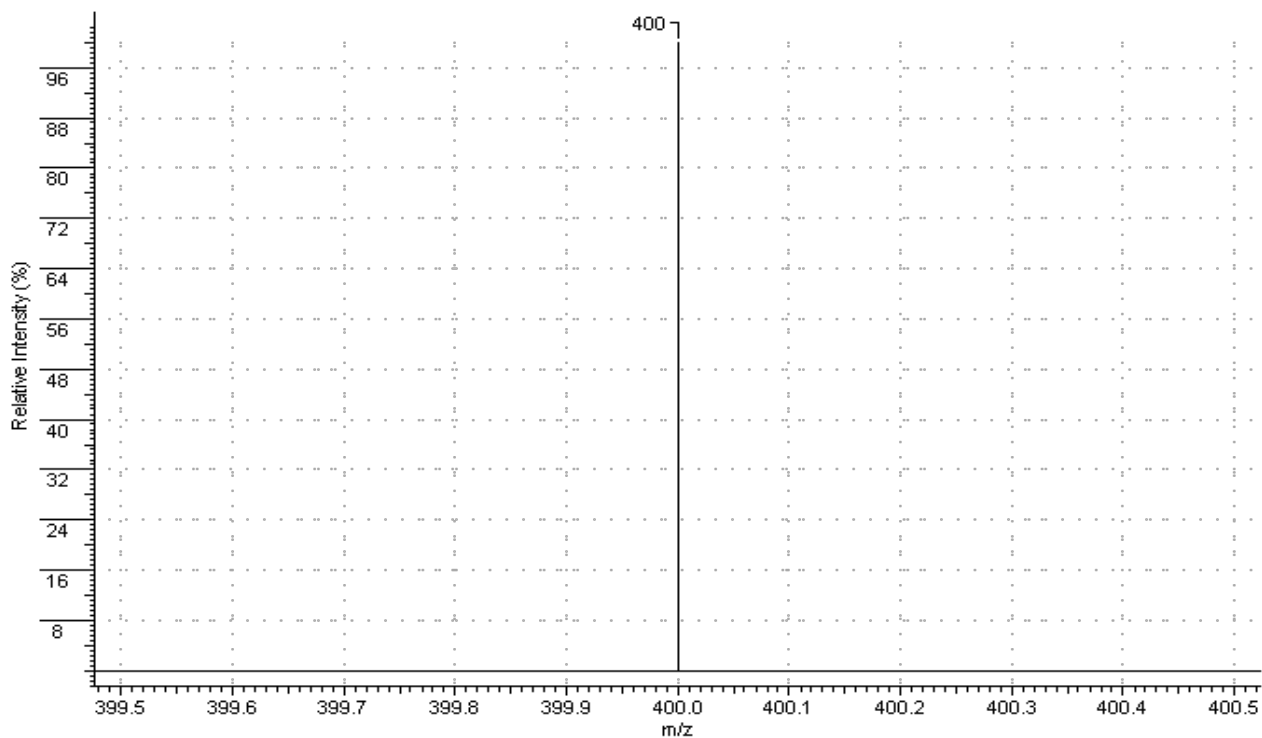

Figure S11. LC-MS/MS spectra of compound EC2

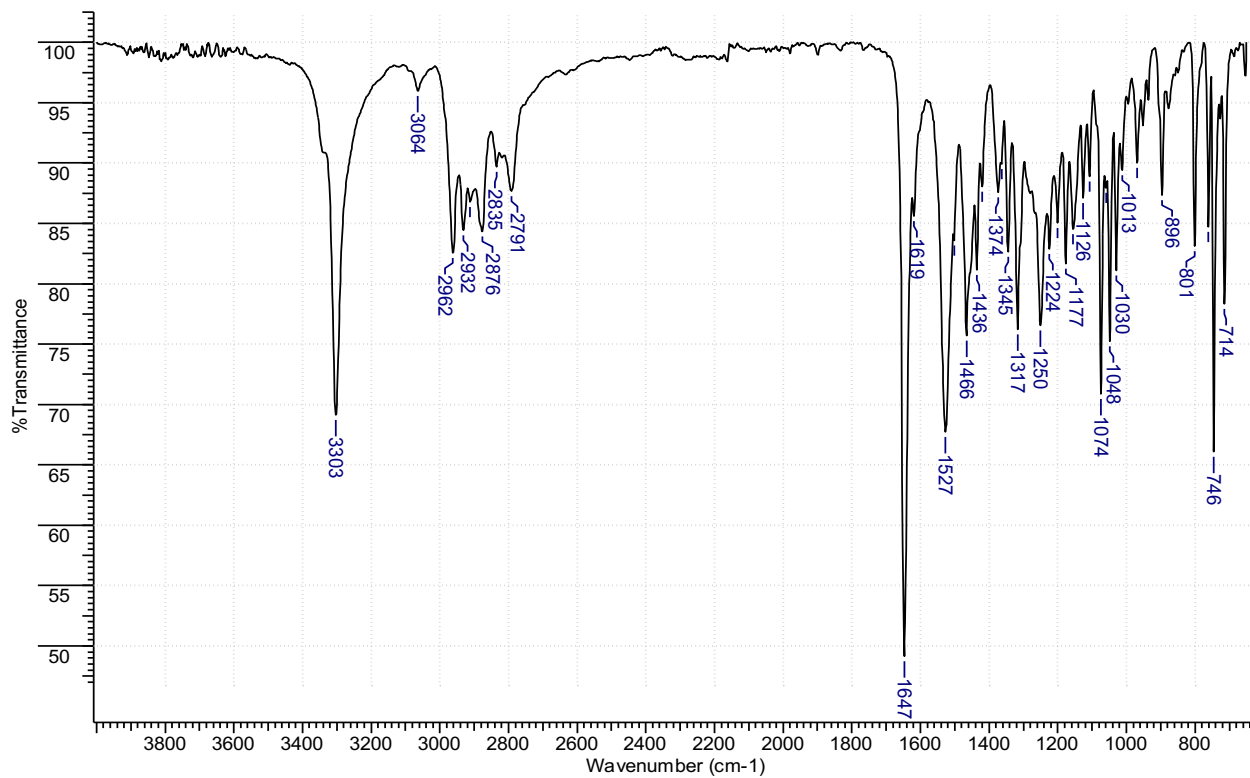

Figure S12. FT-IR spectra of compound EC3

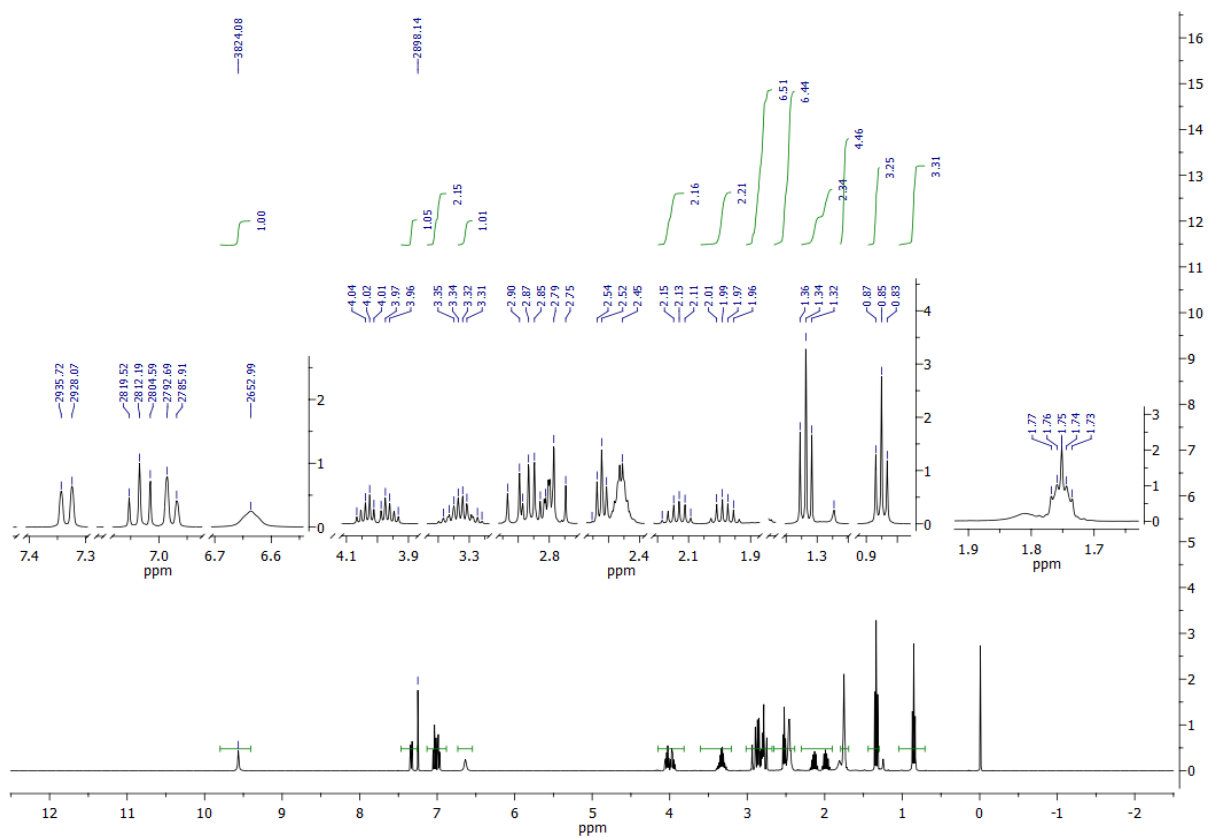

Figure S13.  $^1\text{H}$  NMR spectra of compound EC3

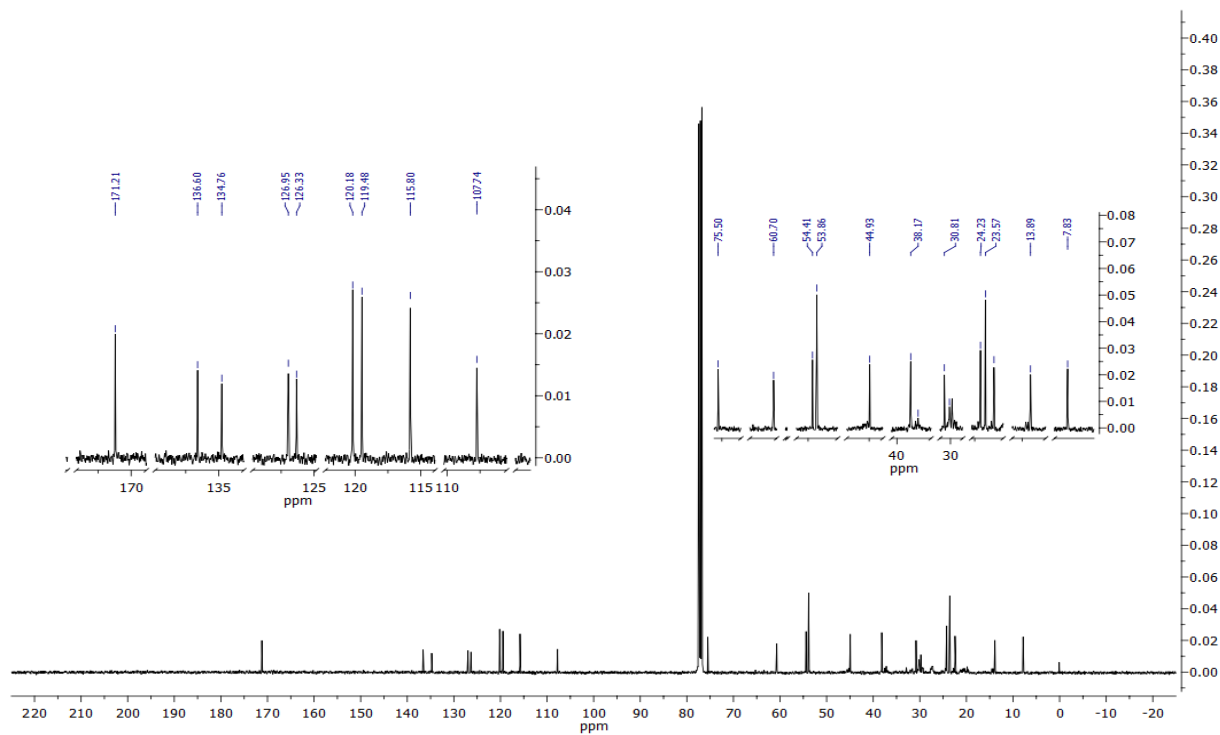

Figure S14. <sup>13</sup>C NMR spectra of compound EC3

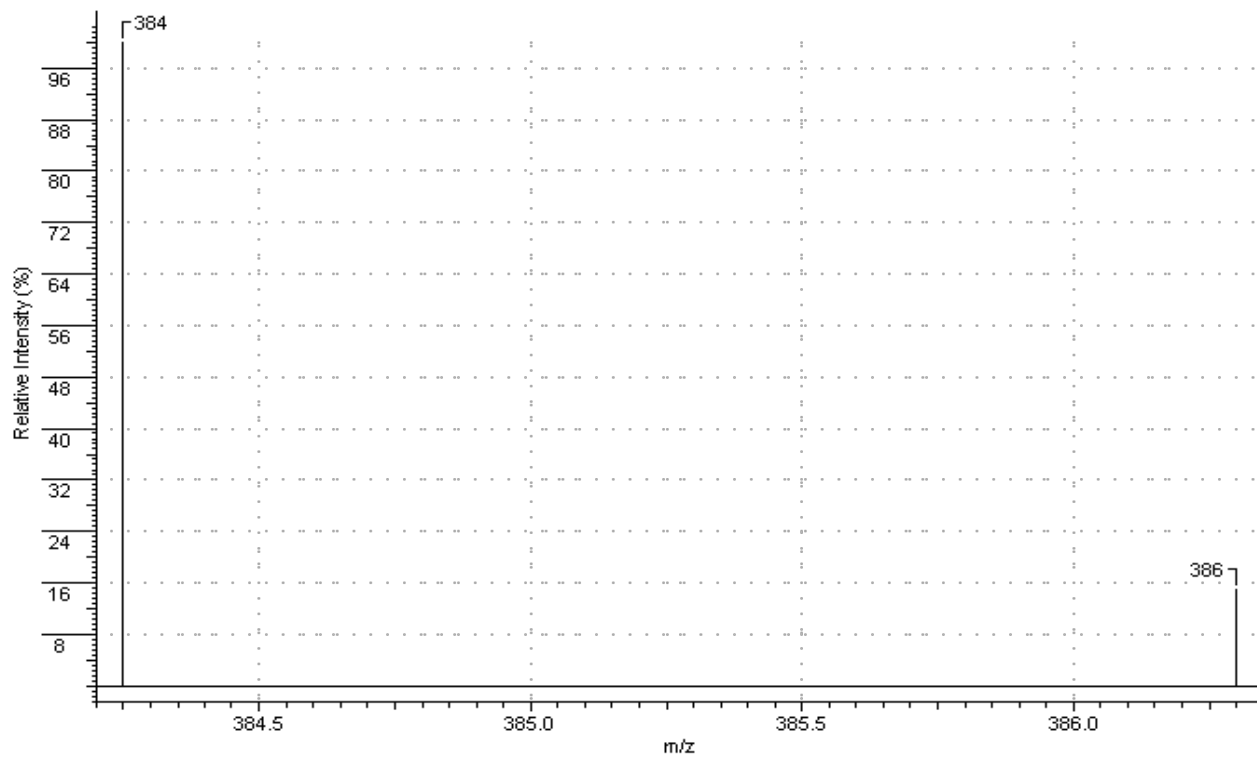

Figure S15. LC-MS/MS spectra of compound EC3

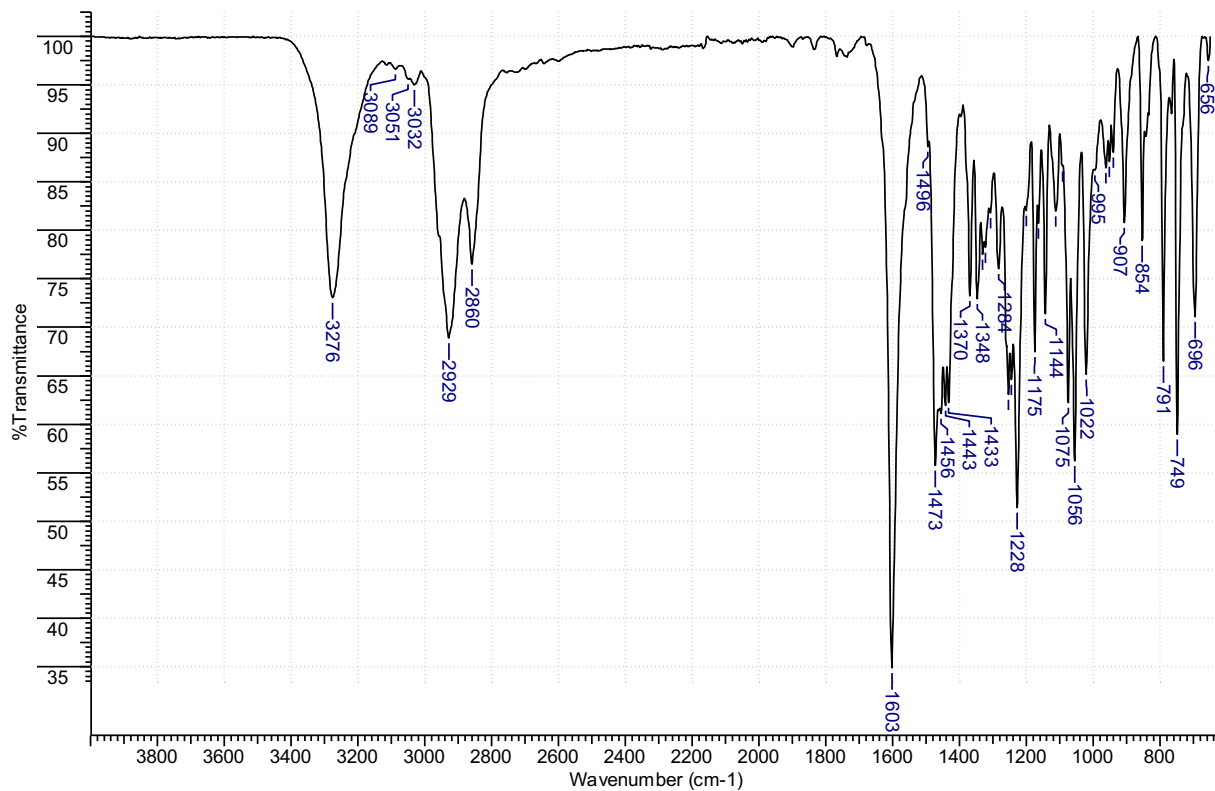

Figure S16. FT-IR spectra of compound EC4

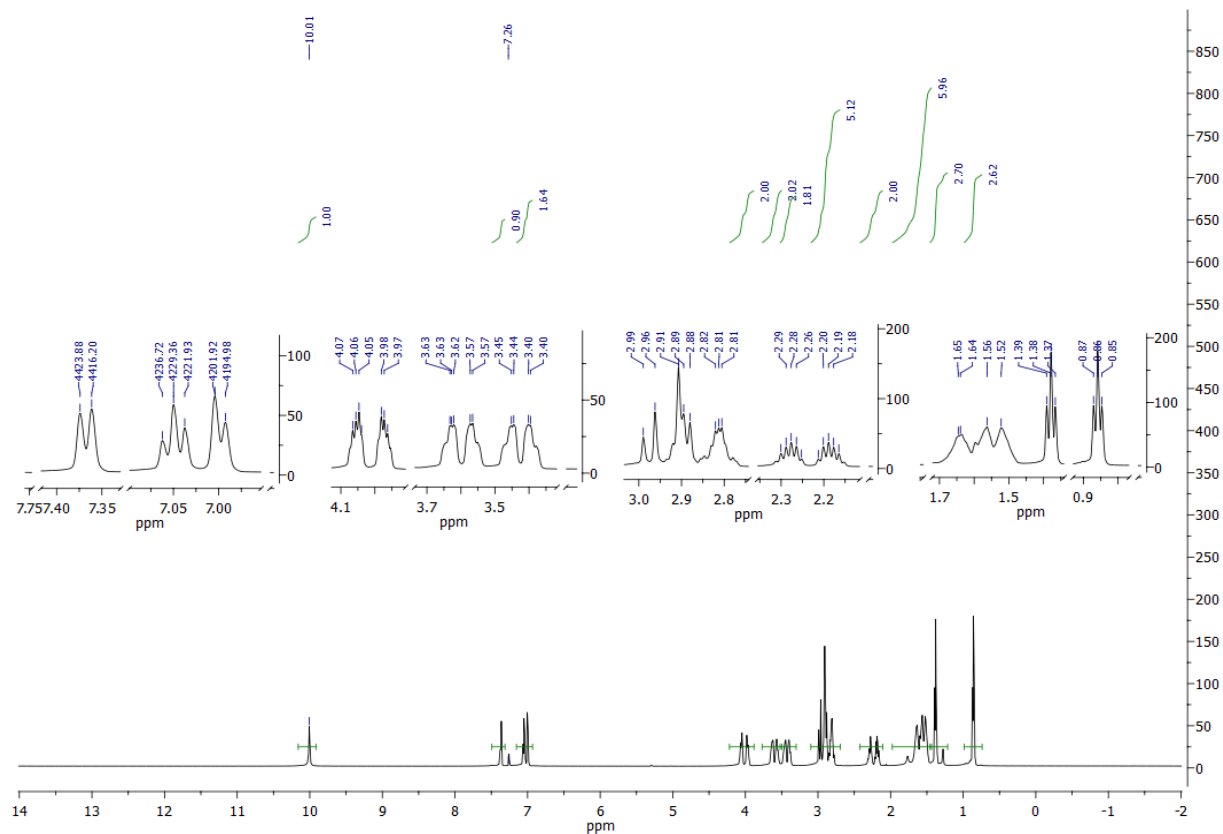

Figure S17. <sup>1</sup>H NMR spectra of compound EC4

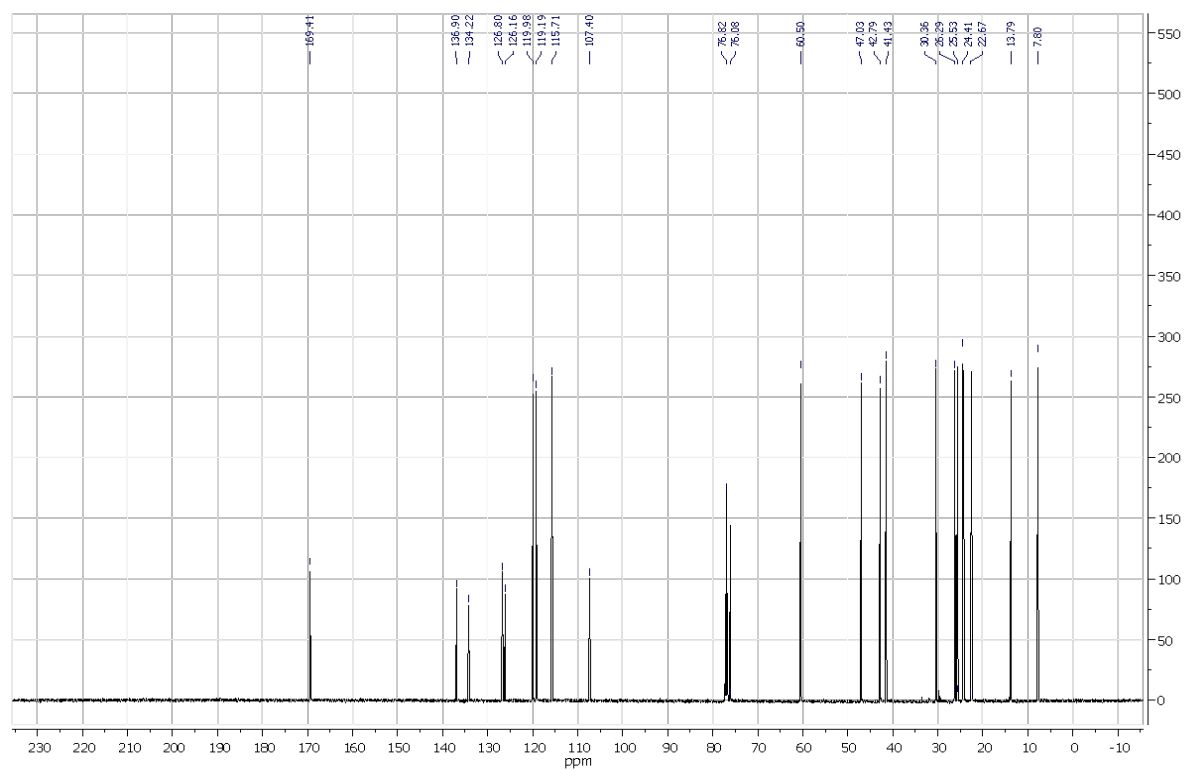

Figure S18. <sup>13</sup>C NMR spectra of compound EC4

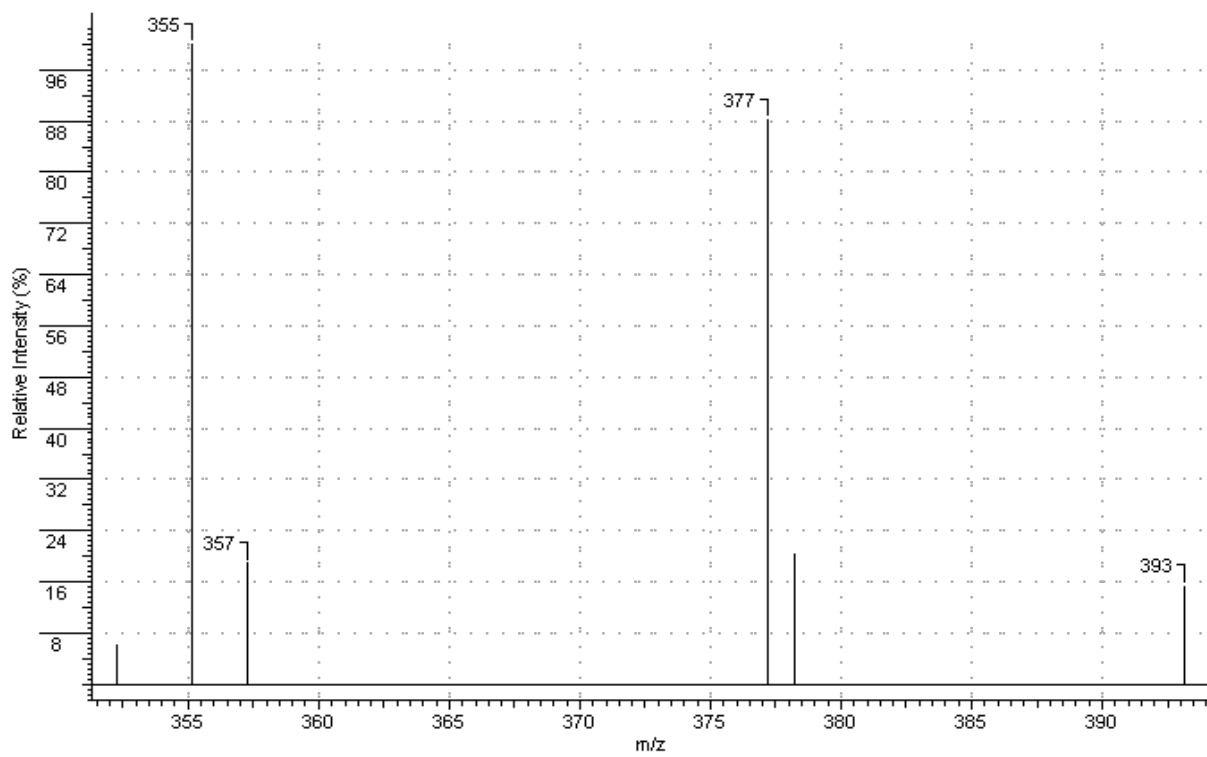

Figure S19. LC-MS/MS spectra of compound EC4

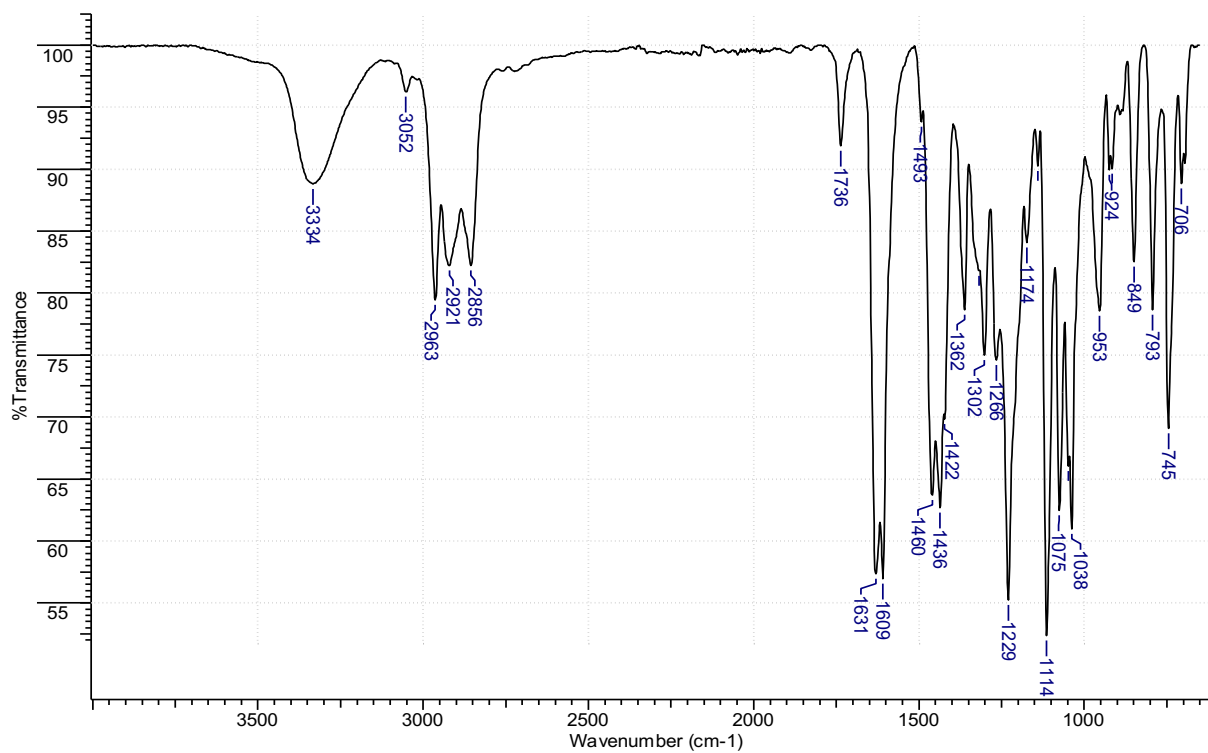

Figure S20. FT-IR spectra of compound EC5

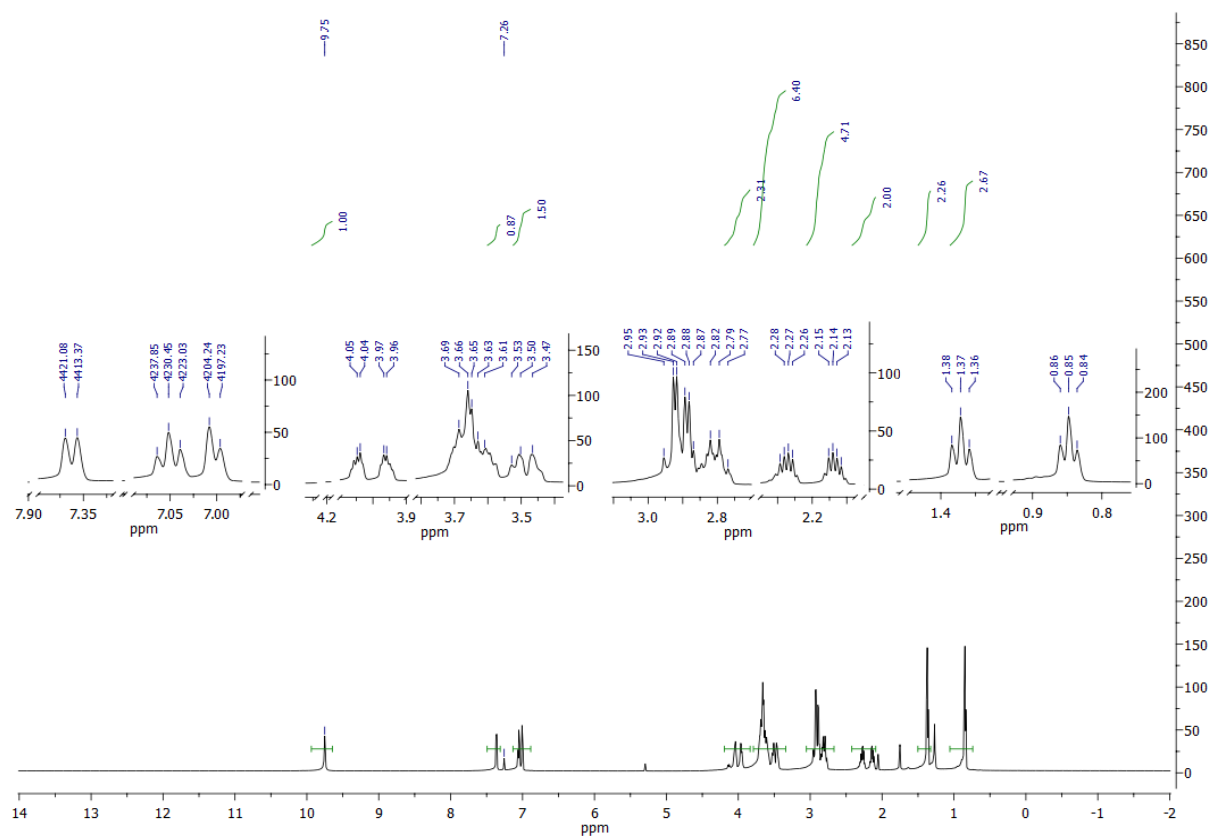

Figure S21. <sup>1</sup>H NMR spectra of compound EC5



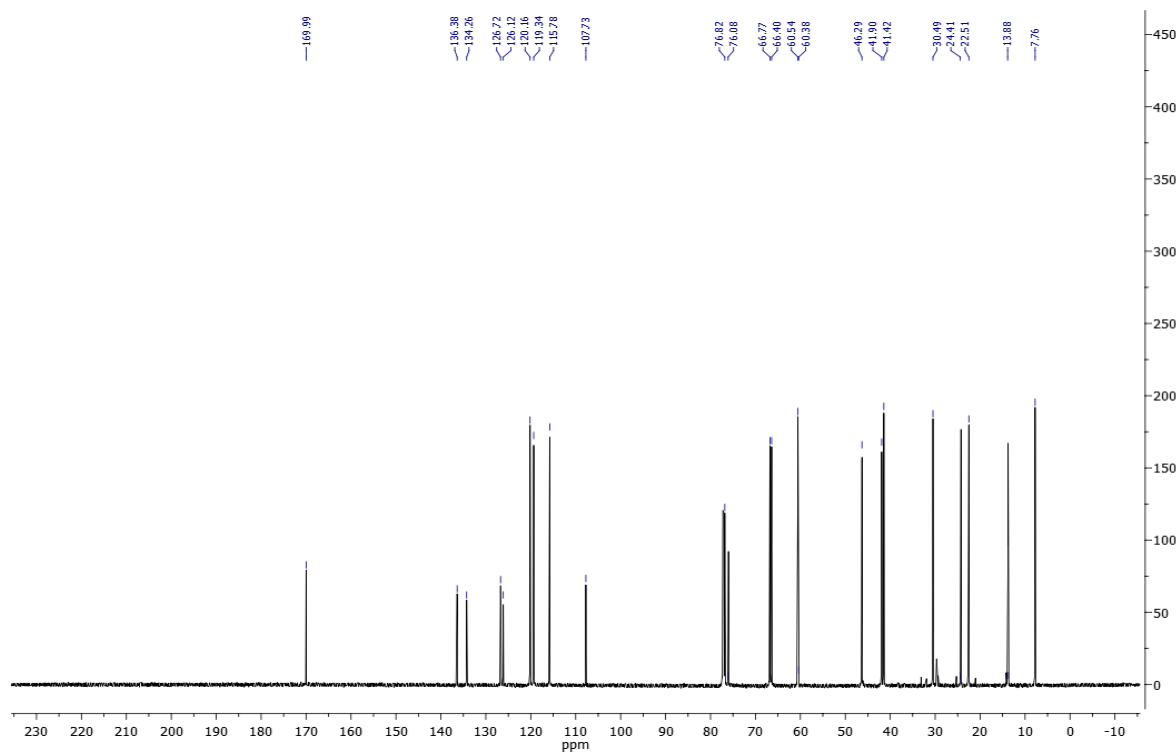

Figure S22.  $^{13}\text{C}$  NMR spectra of compound EC5

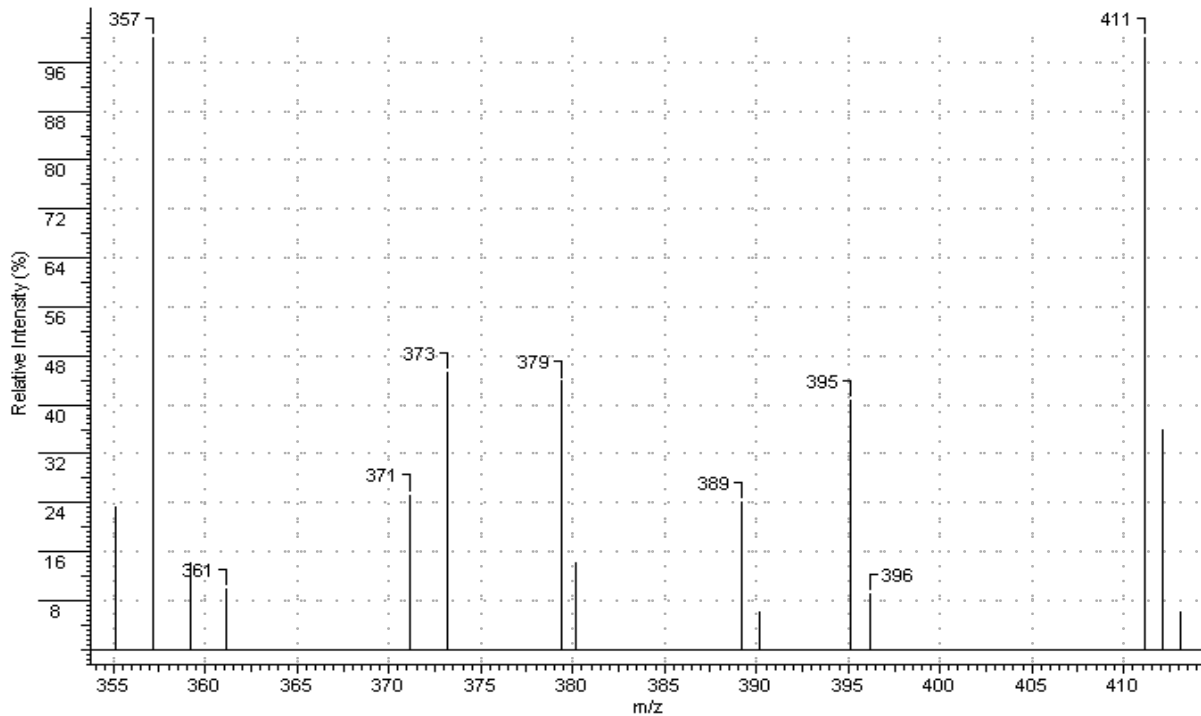

Figure S23. LC-MS/MS spectra of compound EC5

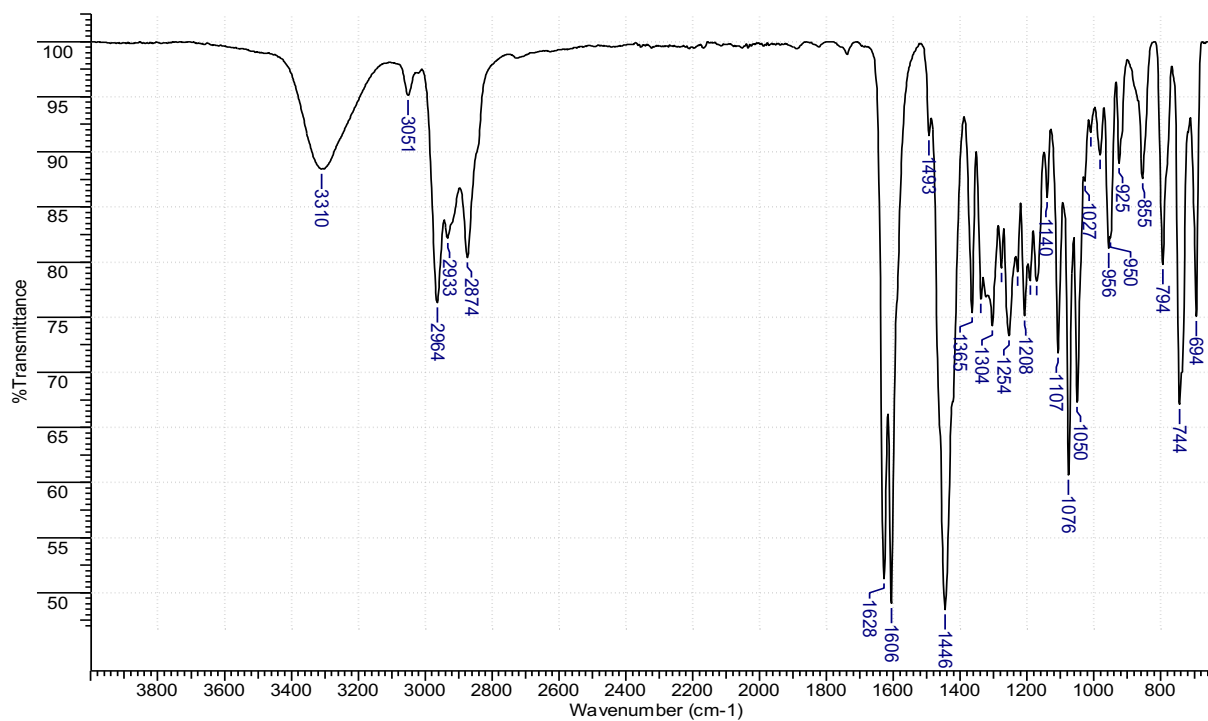

**Figure S24.** FT-IR spectra of compound EC6

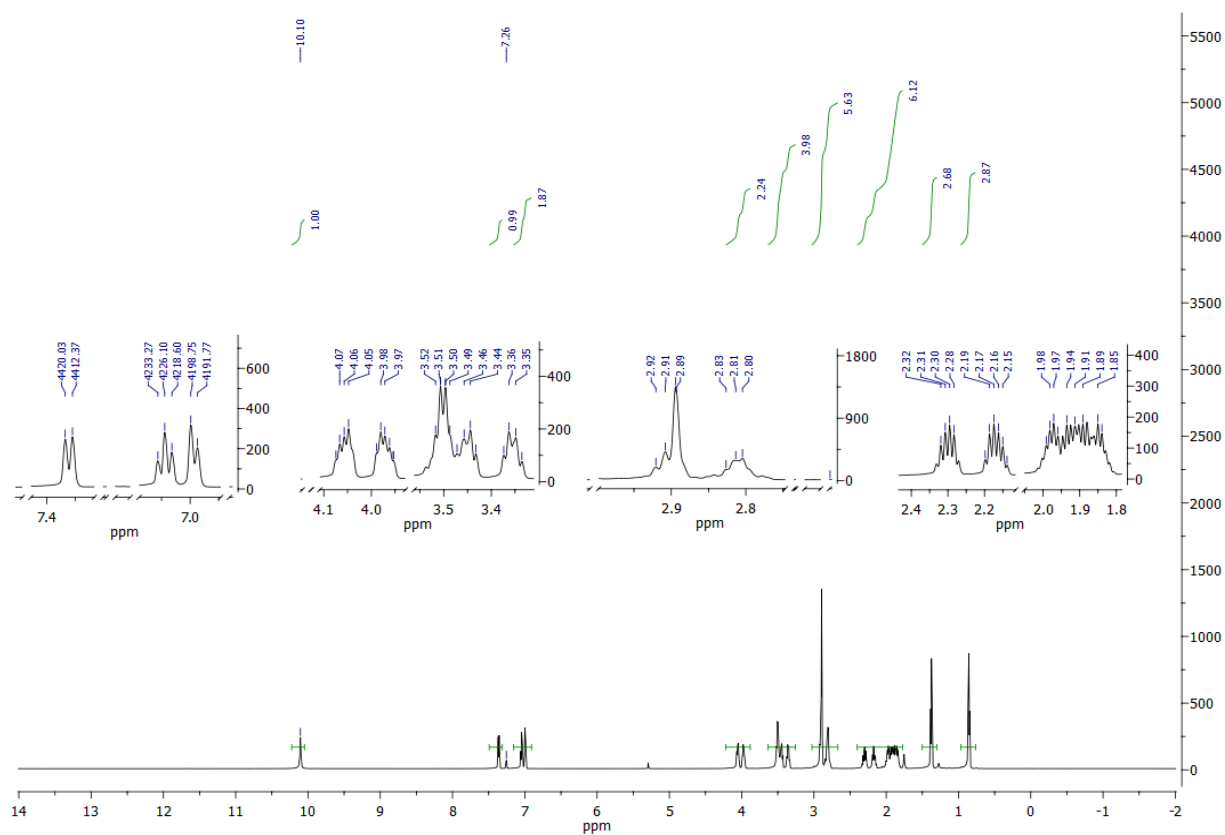

**Figure S25.**  $^1\text{H}$  NMR spectra of compound EC6

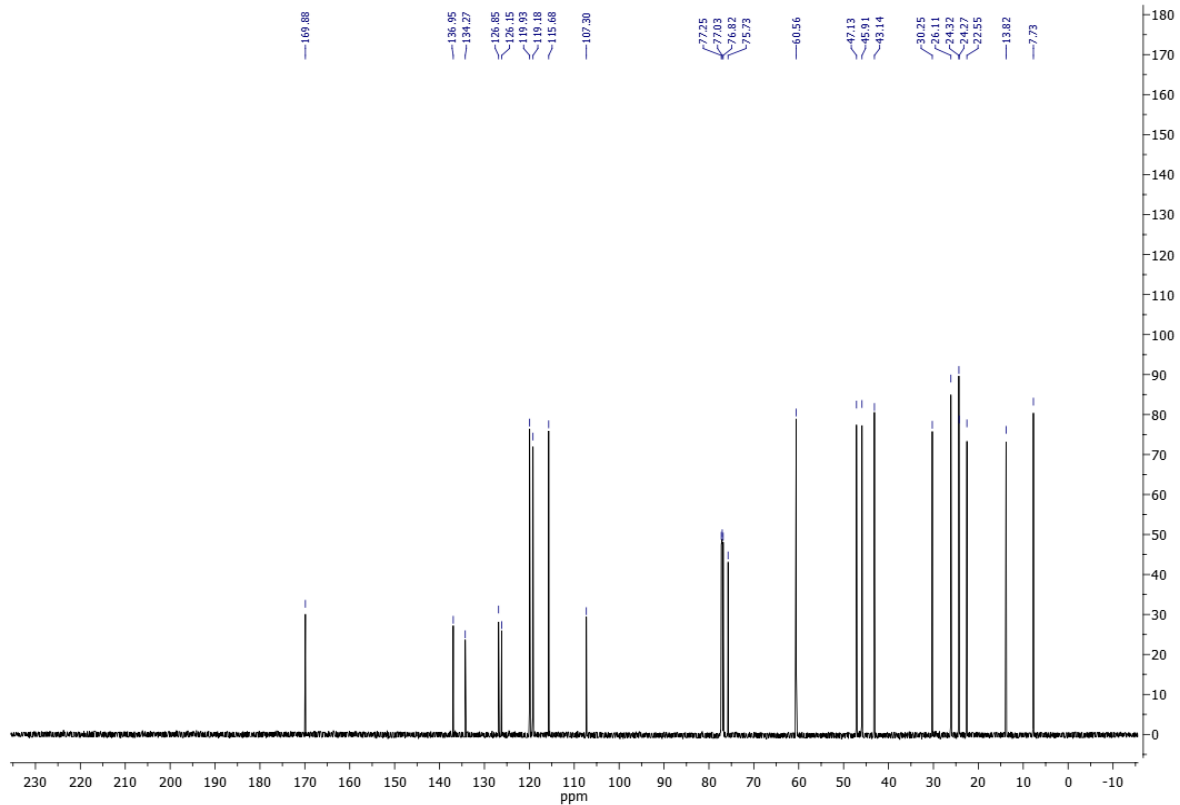

Figure S26. <sup>13</sup>C NMR spectra of compound EC6

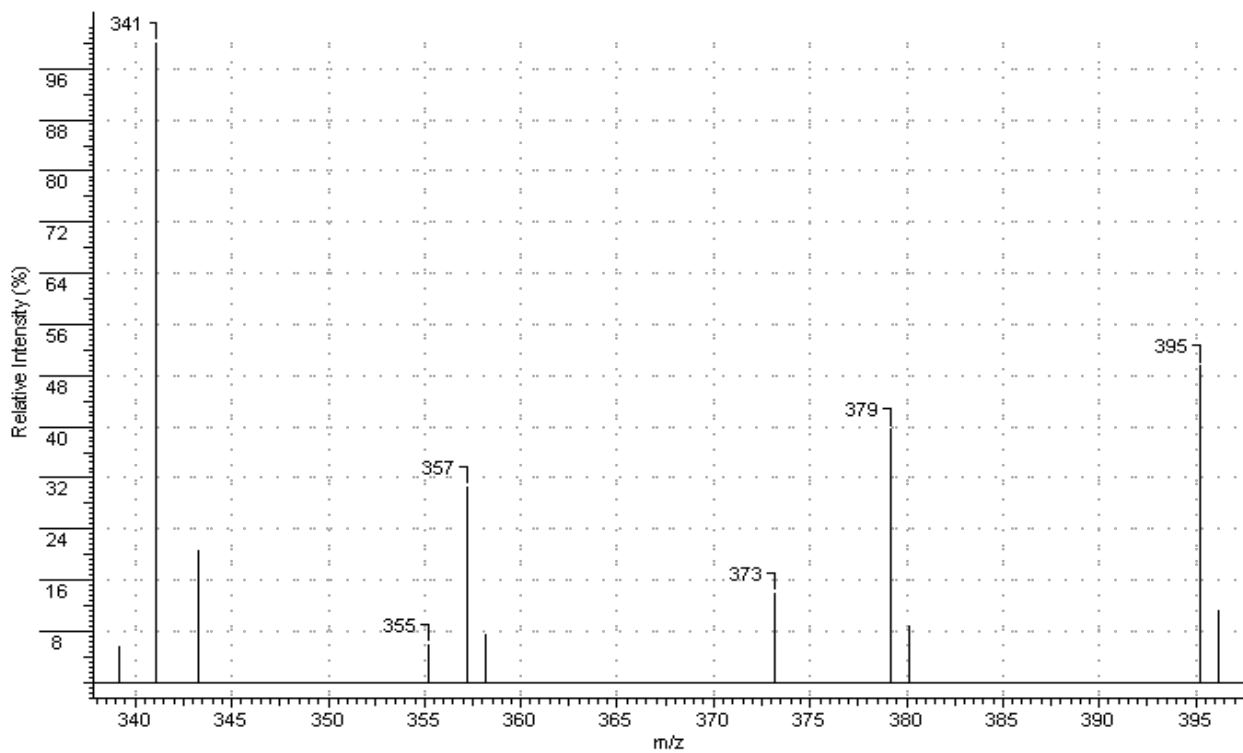

Figure S27. LC-MS/MS spectra of compound EC6

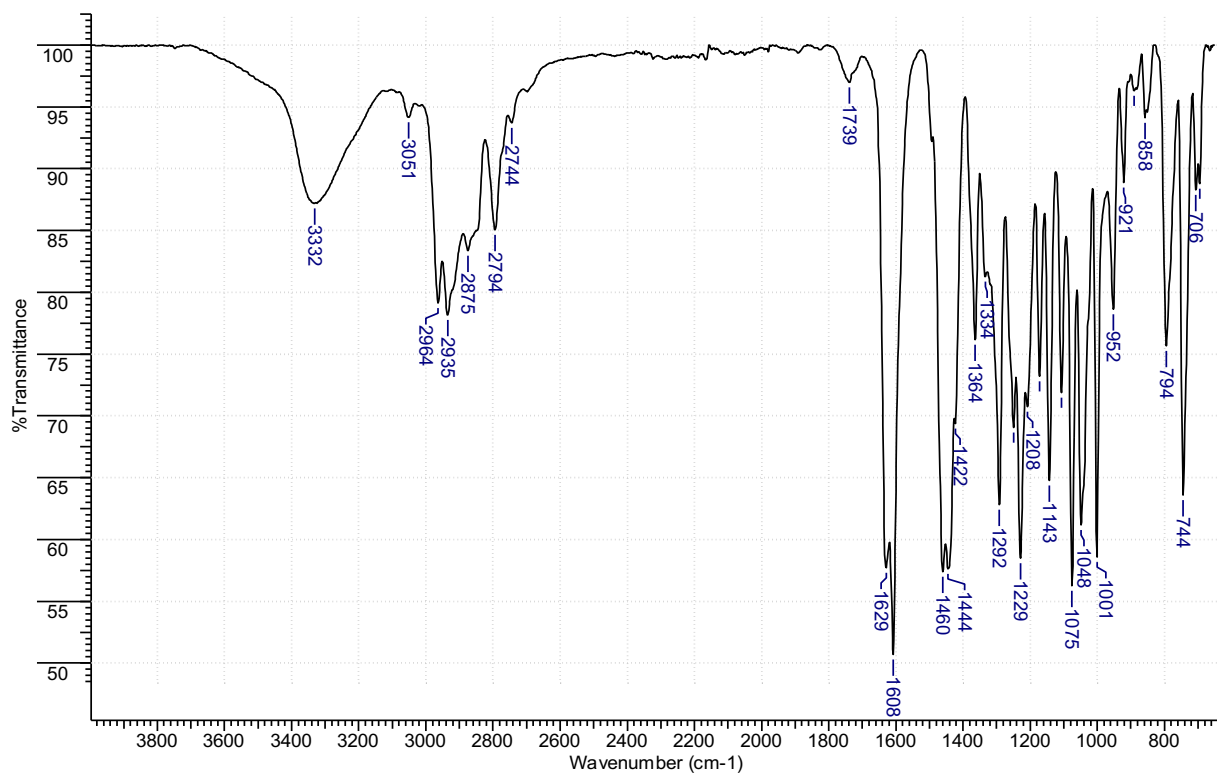

Figure S28. LC-MS/MS spectra of compound EC7

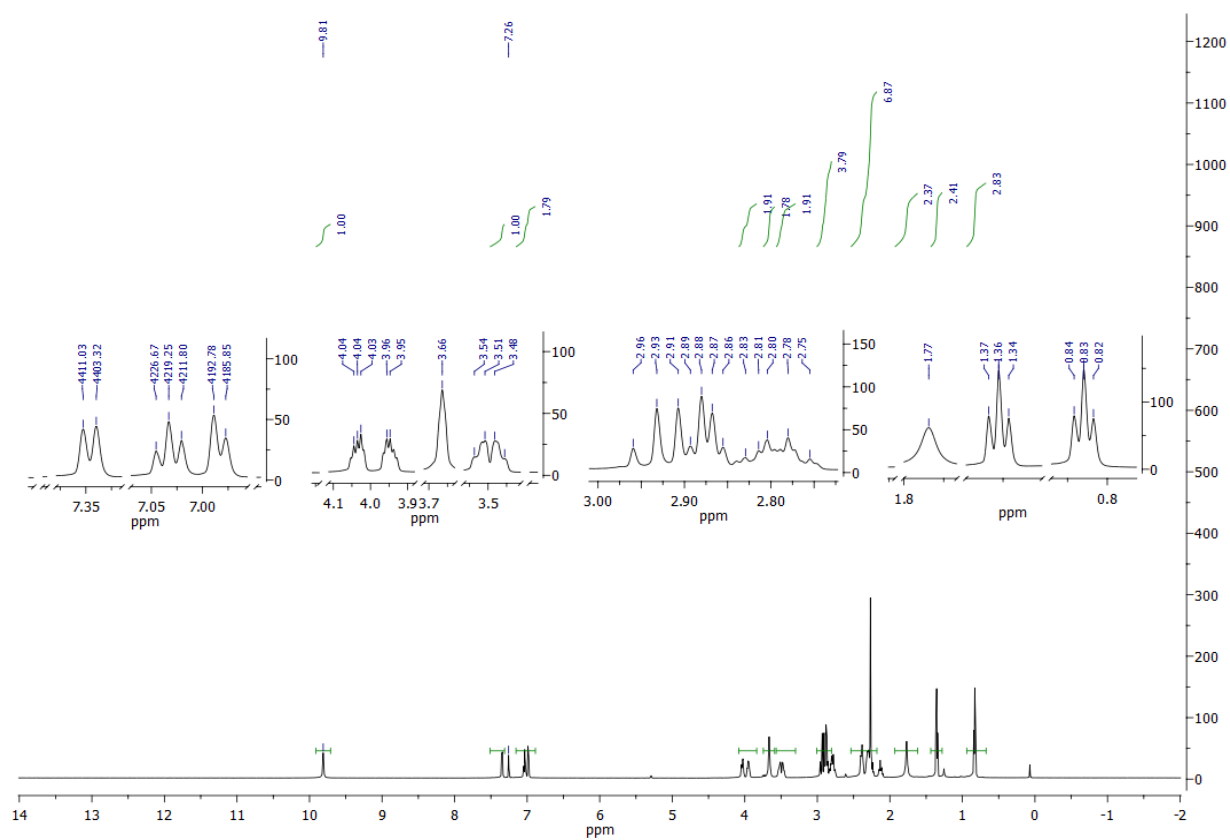

Figure S29. <sup>1</sup>H NMR spectra of compound EC7

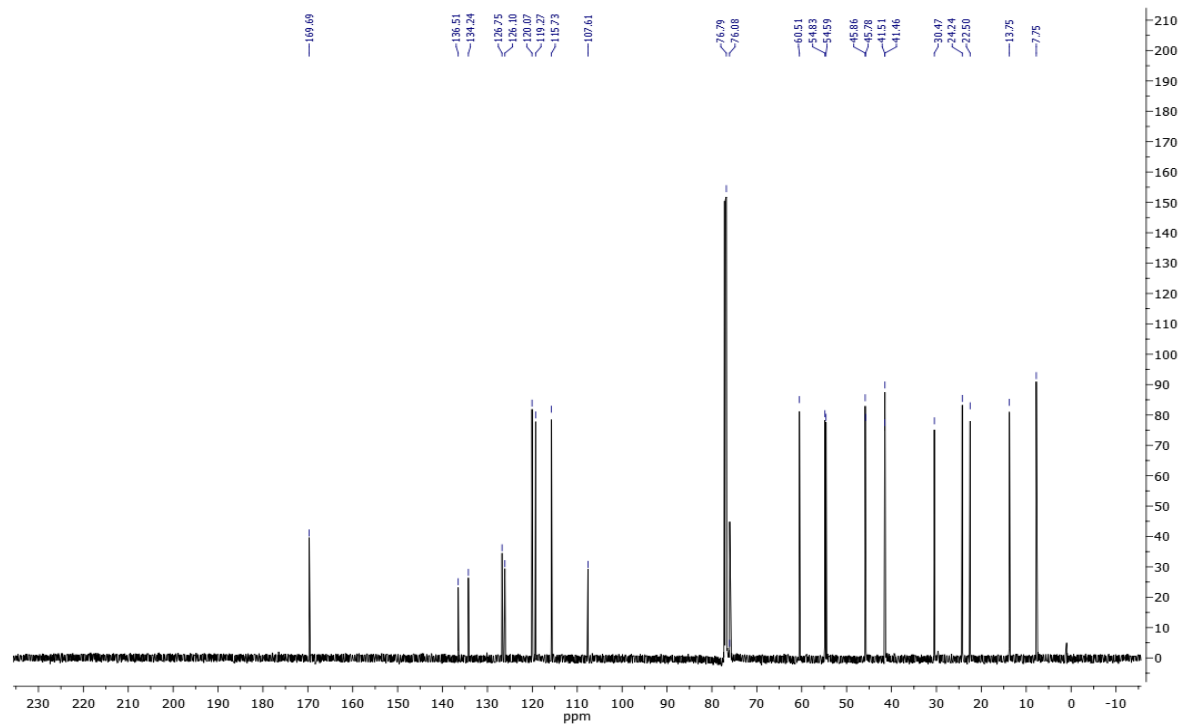

Figure S30. <sup>13</sup>C NMR spectra of compound EC7

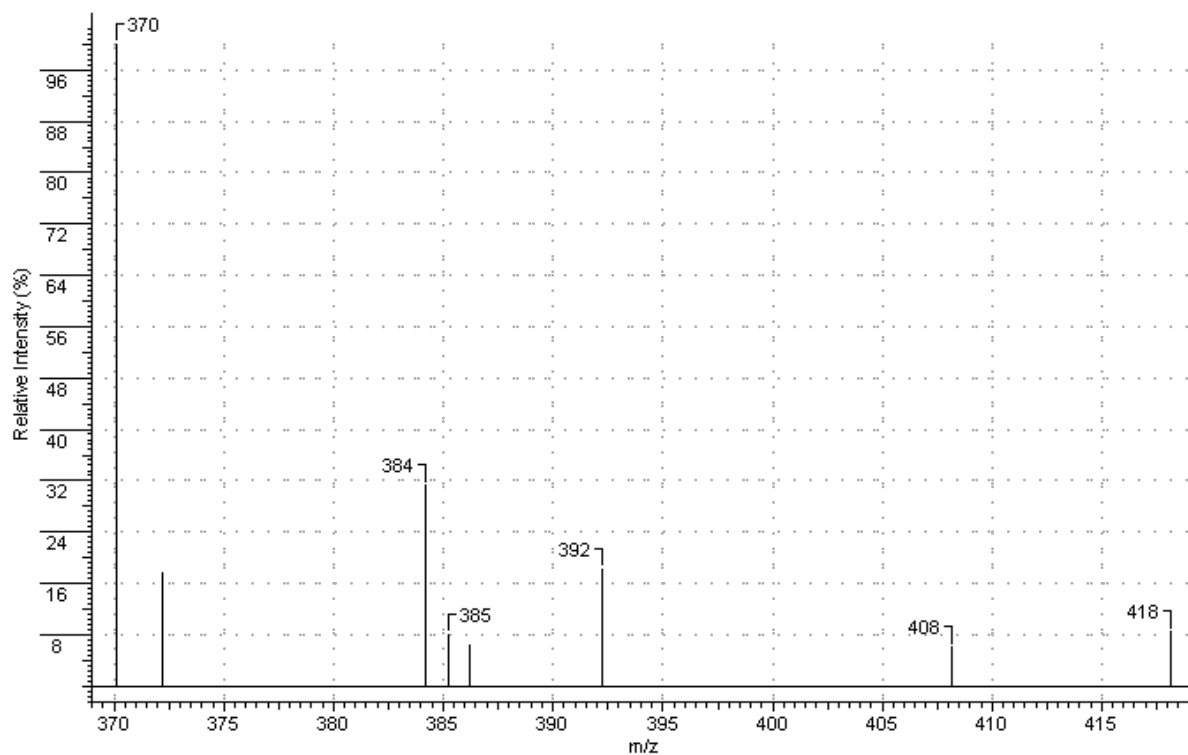

Figure S31. LC-MS/MS spectra of compound EC7

# HPLC Chromotogram

## HPLC Chromatogram of EC1

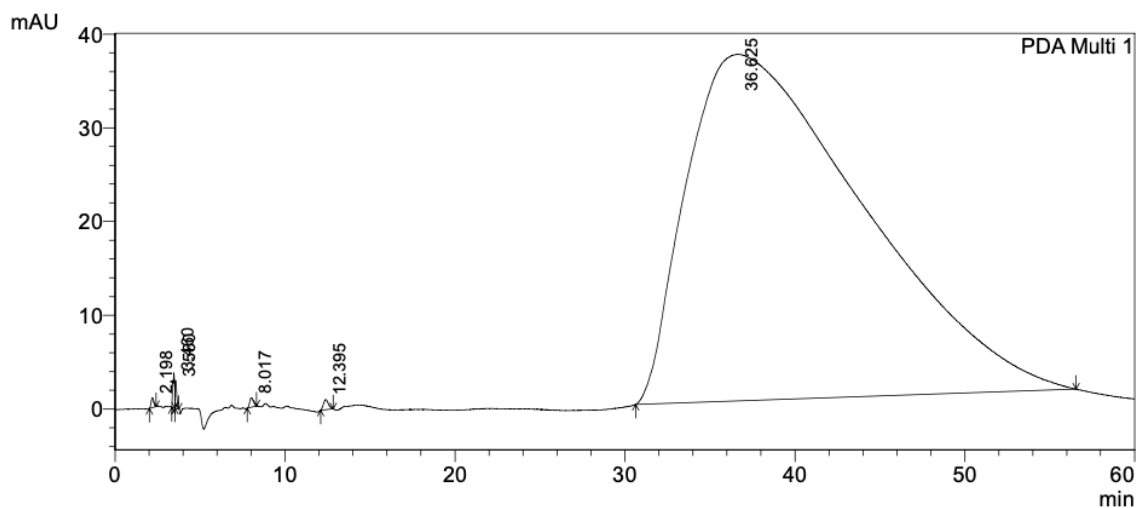

1 PDA Multi 1/224nm 4nm

PeakTable

PDA Ch1 224nm 4nm

| Peak# | Ret. Time | Area     | Height | Area %  | Height % |
|-------|-----------|----------|--------|---------|----------|
| 1     | 2.198     | 11535    | 1047   | 0.043   | 2.234    |
| 2     | 3.460     | 27364    | 3754   | 0.102   | 8.008    |
| 3     | 3.560     | 19328    | 2992   | 0.072   | 6.381    |
| 4     | 8.017     | 15645    | 1016   | 0.058   | 2.167    |
| 5     | 12.395    | 22310    | 1093   | 0.083   | 2.332    |
| 6     | 36.625    | 26701159 | 36978  | 99.641  | 78.878   |
| Total |           | 26797340 | 46880  | 100.000 | 100.000  |

# HPLC Chromatogram of EC2

mAU

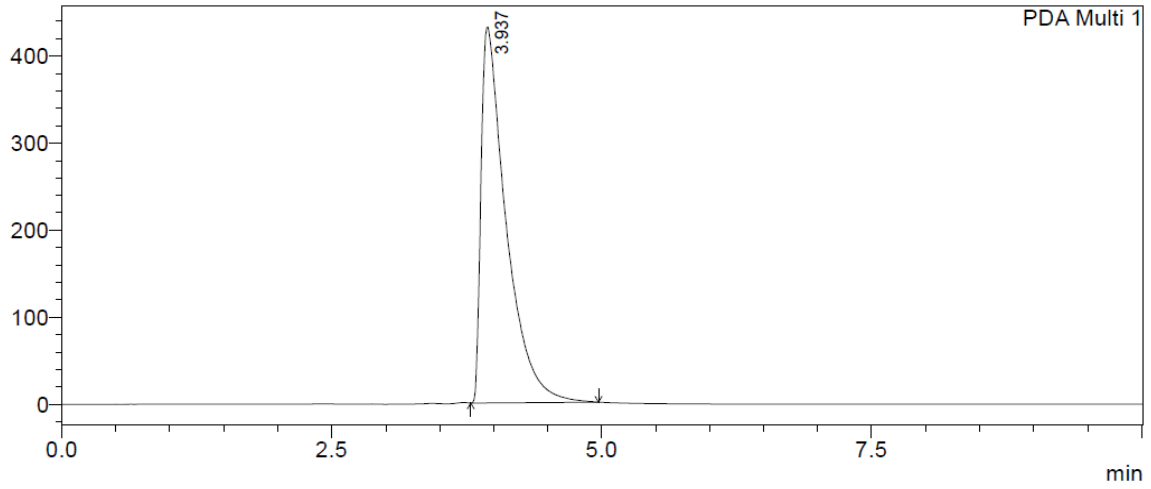

1 PDA Multi 1/254nm 4nm

PeakTable

PDA Ch1 254nm 4nm

| Peak# | Ret. Time | Area    | Height | Area %  | Height % |
|-------|-----------|---------|--------|---------|----------|
| 1     | 3.937     | 6980793 | 431544 | 100.000 | 100.000  |
| Total |           | 6980793 | 431544 | 100.000 | 100.000  |

# HPLC Chromatogram of EC3

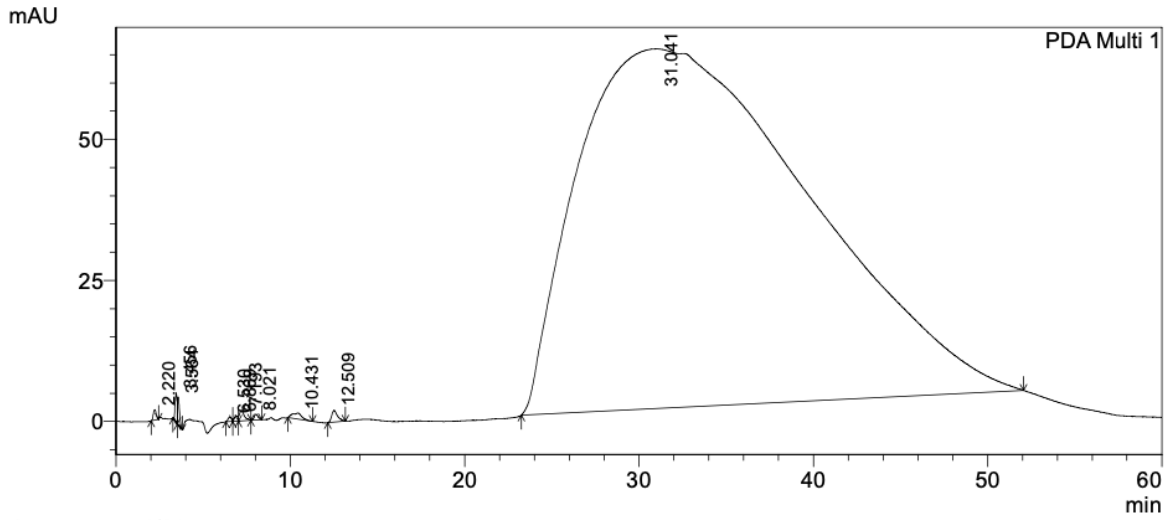

1 PDA Multi 1/224nm 4nm

PeakTable

PDA Ch1 224nm 4nm

| Peak# | Ret. Time | Area     | Height | Area %  | Height % |
|-------|-----------|----------|--------|---------|----------|
| 1     | 2.220     | 20857    | 1860   | 0.035   | 2.230    |
| 2     | 3.456     | 40665    | 5207   | 0.069   | 6.241    |
| 3     | 3.564     | 39393    | 4915   | 0.067   | 5.891    |
| 4     | 6.530     | 11896    | 783    | 0.020   | 0.938    |
| 5     | 6.869     | 14145    | 871    | 0.024   | 1.044    |
| 6     | 7.193     | 35743    | 1864   | 0.061   | 2.235    |
| 7     | 8.021     | 16274    | 1036   | 0.028   | 1.242    |
| 8     | 10.431    | 40238    | 1089   | 0.068   | 1.306    |
| 9     | 12.509    | 49262    | 2071   | 0.084   | 2.482    |
| 10    | 31.041    | 58585534 | 63724  | 99.544  | 76.390   |
| Total |           | 58854007 | 83419  | 100.000 | 100.000  |



### HPLC Chromatogram of EC4

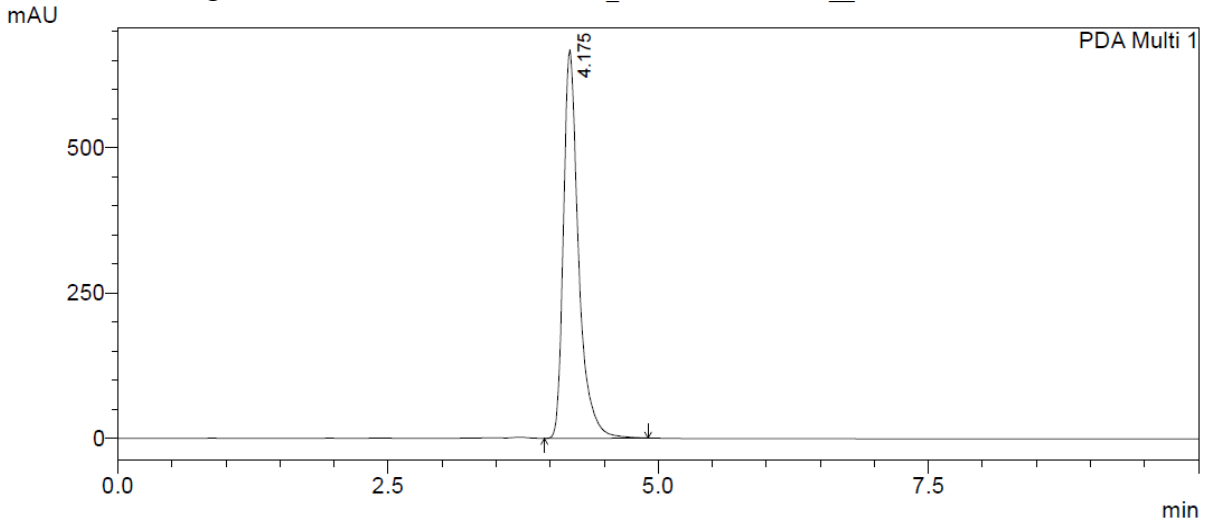

1 PDA Multi 1/254nm 4nm

PeakTable

PDA Ch1 254nm 4nm

| Peak# | Ret. Time | Area    | Height | Area %  | Height % |
|-------|-----------|---------|--------|---------|----------|
| 1     | 4.175     | 6508082 | 668564 | 100.000 | 100.000  |
| Total |           | 6508082 | 668564 | 100.000 | 100.000  |

### HPLC Chromatogram of EC5

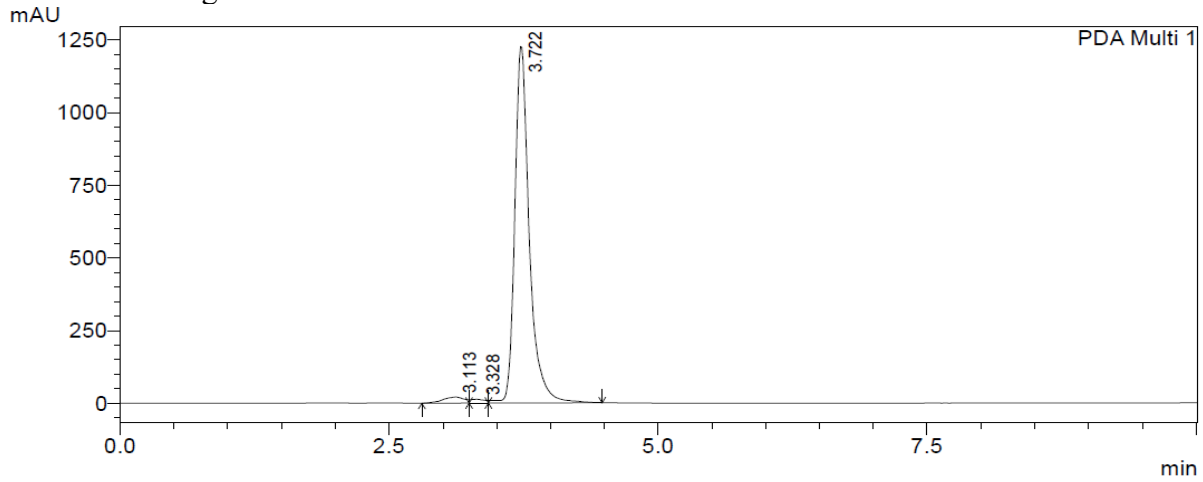

1 PDA Multi 1/254nm 4nm

PeakTable

PDA Ch1 254nm 4nm

| Peak# | Ret. Time | Area     | Height  | Area %  | Height % |
|-------|-----------|----------|---------|---------|----------|
| 1     | 3.113     | 291743   | 20914   | 2.448   | 1.660    |
| 2     | 3.328     | 119529   | 12604   | 1.003   | 1.001    |
| 3     | 3.722     | 11505630 | 1226156 | 96.549  | 97.339   |
| Total |           | 11916902 | 1259674 | 100.000 | 100.000  |

### HPLC Chromatogram of EC6

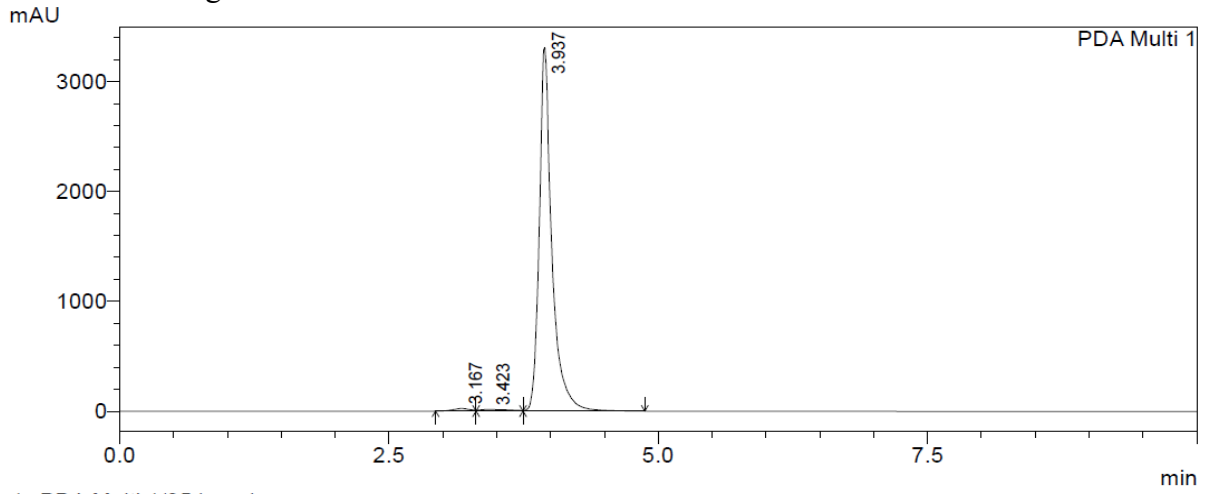

1 PDA Multi 1/254nm 4nm

PeakTable

PDA Ch1 254nm 4nm

| Peak# | Ret. Time | Area     | Height  | Area %  | Height % |
|-------|-----------|----------|---------|---------|----------|
| 1     | 3.167     | 275342   | 24492   | 0.997   | 0.731    |
| 2     | 3.423     | 329188   | 17529   | 1.192   | 0.523    |
| 3     | 3.937     | 27004201 | 3306659 | 97.810  | 98.745   |
| Total |           | 27608732 | 3348680 | 100.000 | 100.000  |

### HPLC Chromatogram of EC7

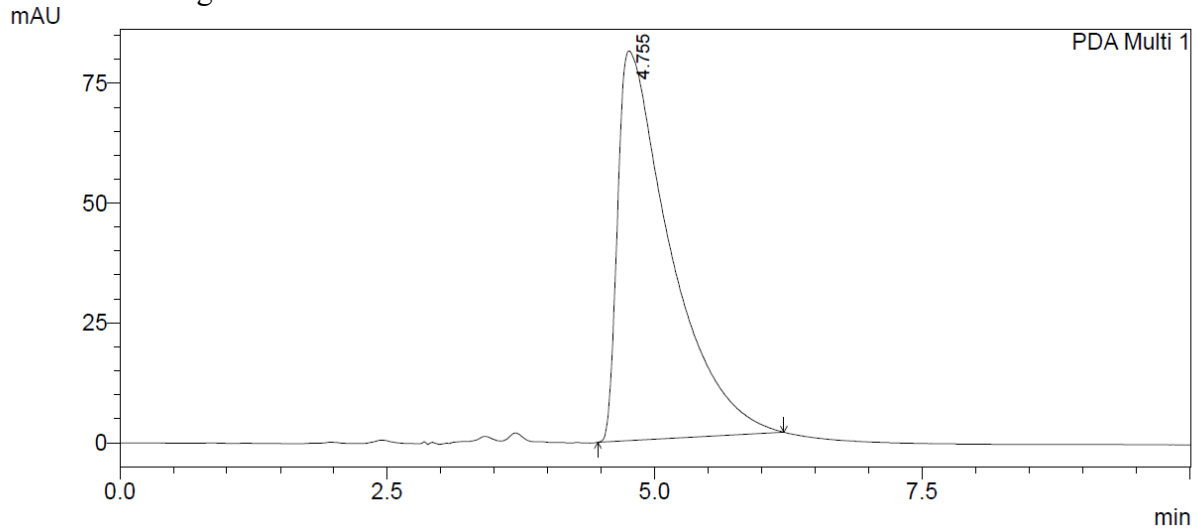

1 PDA Multi 1/254nm 4nm

PeakTable

PDA Ch1 254nm 4nm

| Peak# | Ret. Time | Area    | Height | Area %  | Height % |
|-------|-----------|---------|--------|---------|----------|
| 1     | 4.755     | 2781252 | 81307  | 100.000 | 100.000  |
| Total |           | 2781252 | 81307  | 100.000 | 100.000  |
